1  
2 **Aberrant cell segregation in craniofacial primordia and the emergence of facial**  
3 **dysmorphology in craniofrontonasal syndrome**

4  
5  
6 \*Terren K. Niethamer – Program in Craniofacial Biology, Department of Cell and Tissue Biology,  
7 Biomedical Sciences Graduate Program

8 \*Christopher J. Percival - Department of Anthropology, Stony Brook University, NY, USA

9 Teng Teng- Program in Craniofacial Biology, Department of Cell and Tissue Biology

10 Melanie Franco - Program in Craniofacial Biology, Department of Cell and Tissue Biology

11 Yu Xin Du - Program in Craniofacial Biology, Department of Cell and Tissue Biology

12 Jeffrey O. Bush - Program in Craniofacial Biology, Department of Cell and Tissue Biology, Biomedical  
13 Sciences Graduate Program, Institute for Human Genetics, University of California San Francisco,  
14 San Francisco, CA, USA

15  
16 \* These authors contributed equally to this work (co-first authorship)

17  
18 **Contact Information**

19 Jeffrey O. Bush

20 Box 0512, Department of Cell and Tissue Biology

21 513 Parnassus Ave

22 San Francisco, CA 94143

23 (415) 476-9459

24 Jeffrey.Bush@ucsf.edu

25  
26  
27  
28

## 29 Abstract

30 Craniofrontonasal syndrome (CFNS) is a rare X-linked disorder characterized by craniofacial, skeletal,  
31 and neurological anomalies and caused by mutations in *EFNB1*. Heterozygous females are more severely  
32 affected by CFNS than hemizygous male patients, a phenomenon called cellular interference that is correlated  
33 with cell segregation resulting from EPHRIN-B1 mosaicism. *Efnb1* heterozygous mutant mice also exhibit more  
34 severe phenotypes than *Efnb1* hemizygous males as well as cell segregation, but how craniofacial  
35 dysmorphology arises from cell segregation is unknown and CFNS etiology therefore remains poorly  
36 understood. Here, we couple geometric morphometric techniques with temporal and spatial interrogation of  
37 embryonic cell segregation in mouse models to elucidate mechanisms underlying CFNS pathogenesis. By  
38 generating ephrin-B1 mosaicism at different developmental timepoints and in specific cell populations, we find  
39 that ephrin-B1 regulates cell segregation independently in early neural development and later in craniofacial  
40 development, correlating with the emergence of quantitative differences in face shape. Whereas specific  
41 craniofacial shape changes are qualitatively similar in *Efnb1* heterozygous and hemizygous mutant embryos,  
42 heterozygous embryos are quantitatively more severely affected, indicating that *Efnb1* mosaicism exacerbates  
43 loss of function phenotypes rather than having a neomorphic effect. Notably, tissue-specific disruption of *Efnb1*  
44 throughout neural development does not appear to contribute to CFNS dysmorphology, but its disruption within  
45 neural crest cell-derived mesenchyme results in phenotypes very similar to widespread loss. Ephrin-B1 can  
46 bind and signal with EphB1, EphB2, and EphB3 receptor tyrosine kinases, but the signaling partner(s) relevant  
47 to CFNS are unknown. Geometric morphometric analysis of an allelic series of *Ephb1*; *Ephb2*; *Ephb3* mutant  
48 embryos indicates that EphB2 and EphB3 are key receptors mediating *Efnb1* hemizygous-like phenotypes, but  
49 the complete loss of EphB1-3 does not recapitulate CFNS-like *Efnb1* heterozygous severity. Finally, by  
50 generating *Efnb1*<sup>+/-</sup>; *Ephb1*; *Ephb2*; *Ephb3* quadruple knockout mice, we determine how modulating cumulative  
51 receptor activity influences cell segregation in craniofacial development and find that while EphB2 and EphB3  
52 play an important role in craniofacial cell segregation, EphB1 is more important for cell segregation in the brain;  
53 surprisingly, complete loss of EphB1-EphB3 does not completely abrogate cell segregation. Together, these  
54 data advance our understanding of the morphogenetic etiology and signaling interactions underlying CFNS  
55 dysmorphology.

## 56 Author Summary

57 Craniofacial anomalies are extremely common, accounting for one third of all birth defects, but even  
58 when the responsible genes are known, it often remains to be determined exactly how development has gone  
59 wrong. Craniofrontonasal syndrome (CFNS), which affects multiple aspects of craniofacial development, is a  
60 particularly mysterious disorder because it is X-linked, but affects females more severely than males, the  
61 opposite situation of most X-linked diseases. The responsible gene has been identified as *EFNB1*, which  
62 encodes the EPHRIN-B1 signaling molecule that regulates cellular position. Why *EFNB1*<sup>+/-</sup> heterozygous  
63 females exhibit severe stereotypical CFNS phenotypes is not well understood, but it is related to the fact that X  
64 chromosome inactivation generates mosaicism for EPHRIN-B1. Using mice harboring mutations in the *Efnb1*  
65 gene in different embryonic tissues, and in receptor genes *Ephb1-3*, together with quantitative methods to  
66 measure craniofacial structures in developing embryos, we establish the tissue-specific contributions of ephrin-  
67 B1 mosaicism to craniofacial dysmorphology. We also examine when ephrin-B1 regulates cellular position  
68 during different stages of craniofacial development and which EphB receptors are involved. Our results reveal  
69 the specific cellular context and signaling interactions that are likely to underlie CFNS, and provide new  
70 understanding of how EPHRIN-B1 may regulate normal craniofacial development.

## 72 Introduction

73 Congenital craniofacial anomalies account for one third of all birth defects [1]. Advances in craniofacial  
74 genetics have identified many genes involved in craniofacial syndromes [2], but an understanding of the  
75 underlying etiology and progression over developmental time for each condition will be necessary for improved  
76 therapies for this large group of disorders. Craniofrontonasal syndrome (CFNS, OMIM #304110) is a form of  
77 frontonasal dysplasia that is caused by loss of function mutations in EPHRIN-B1 (*EFNB1*), which is located on  
78 the X chromosome [3–5]. Paradoxically, though this syndrome is X-linked, *EFNB1* heterozygous females are  
79 severely affected by CFNS, whereas males with hemizygous loss of *EFNB1* function appear mildly affected or  
80 unaffected; this phenomenon is termed “cellular interference,” though how this difference in severity arises is  
81 currently unknown [4–6]. Heterozygous female patients frequently display a combination of orbital  
82 hypertelorism, based on measurements of inner canthal and interpupillary distances or on computed

83 tomography (CT) scans, a short and wide upper face, facial asymmetry, unilateral or bilateral coronal  
84 craniosynostosis, a short nose, bifid nasal tip, and a broad nasal bridge [3–5,7]. In a subset of cases, cleft lip  
85 and palate, agenesis of the corpus callosum [4], and maxillary hypoplasia [7] have also been noted. In addition  
86 to craniofacial defects, patients present with skeletal defects including syndactyly and polydactyly.

87 CFNS has been termed a neurocristopathy, and it has been hypothesized that CFNS phenotypes may  
88 be partly attributable to impacts on early neural crest cell (NCC) migration or to later bone differentiation  
89 defects [4,8–10]; however, the precise developmental etiology of this disorder remains unknown. Because  
90 CFNS patients are clinically evaluated postnatally but craniofacial development begins very early during  
91 embryogenesis, it is difficult to pinpoint the developmental timing and tissue origin of the craniofacial  
92 phenotypes. Hypertelorism, frontonasal dysplasia and widened midface are key defining phenotypes that may  
93 have a variety of embryologic tissue origins. It is possible that these changes are due to early defects in NCCs,  
94 but they could also be secondary to changes in morphology of the brain and/or neurocranium, or caused by  
95 later changes in the morphogenesis of craniofacial structures. The forebrain develops in close interaction with  
96 the developing midface, and provides a physical substrate that shapes the midface [11,12]. Reduced brain  
97 growth correlates with reduced facial growth in a short-faced mutant mouse model [13], and in humans, brain  
98 shape differences were found to be correlated with the occurrence of cleft lip with or without cleft palate (CL/P)  
99 and cleft palate only (CPO) [14]. Increases in brain size could underlie clefting phenotypes by increasing  
100 separation of the facial prominences to an extent that they can no longer make contact, even if their outgrowth  
101 is normal [15,16]. Molecular signaling from the brain to the developing midface can also impact craniofacial  
102 morphogenesis and contributes to hypotelorism, and possibly hypertelorism [17–20]. Facial dysmorphology  
103 may also be secondary to other skull phenotypes, including craniosynostosis, which restricts the directions of  
104 skull growth [21,22] or to modified cranial base growth [23,24]. However, evidence of effects of  
105 craniosynostosis syndrome mutations on early facial shape highlight that frontonasal dysplasia can also be a  
106 primary result of local developmental perturbations of facial prominence growth patterns [25–27].

107 EPHRIN-B1 is a member of the Eph/ephrin family of membrane-linked signaling molecules; signaling  
108 between Eph receptors and ephrins is important for boundary formation, cell migration, axon guidance,  
109 vascular development, and neurogenesis [28–36]. Analysis of several tissue types indicates that X-inactivation

is not biased by *EFNB1* mutation [4,37], suggesting that loss of gene function does not impact cell survival. Supporting the idea that mosaicism for ephrin-B1 expression results in more severe dysmorphogenesis, rare male patients with severe CFNS phenotypes exhibit somatic mosaicism for *EFNB1* mutations [37–39]. Mosaicism for *Efnb1* mutation has been demonstrated to result in cell segregation between ephrin-B1 expressing and non-expressing cells in mice [40–42], though the timing of onset and tissue origin of segregation relevant to CFNS was not established in these studies. More recently, we have demonstrated that cell segregation occurs in the early neural plate in *Efnb1*<sup>+/-</sup> mouse embryos, and in neuroectodermal cells differentiated from CFNS patient iPSCs [43,44], but it is unknown whether this cell segregation contributes to craniofacial phenotypes.

Mosaic loss of ephrin-B1 expression in *Efnb1*<sup>+/-</sup> mice leads to additional phenotypes not found in hemizygous (*Efnb1*<sup>+/Y</sup>) or homozygous (*Efnb1*<sup>-/-</sup>) loss in mice [8,41,42], mirroring the severity seen in female heterozygous CFNS patients. Although this mouse model is considered to phenocopy CFNS, the facial forms of heterozygous and hemizygous mice have not been described beyond the report of relatively high frequency of cleft palate and shorter skulls [8,9,42]. In addition, the relationship between timing and tissue specificity of cell segregation and phenotypic progression of CFNS craniofacial phenotypes is unknown, and how ephrin-B1-mediated segregation contributes to facial dysmorphogenesis therefore remains mysterious.

Here, we use mouse models of CFNS to determine the timing and cell type specificity of ephrin-B1-mediated cell segregation as it relates to the onset and progression of craniofacial phenotypes. We compare the facial form of *Efnb1* heterozygous female and hemizygous male embryos with control embryos across four stages of craniofacial development to quantify the specific effects of *Efnb1* loss on facial growth and development to better understand the ontogeny of CFNS dysmorphology. Through tissue-specific generation of *Efnb1* mosaicism, we demonstrate that ephrin-B1 is a potent regulator of cell segregation in multiple cell types across craniofacial development and that the timing of segregation in craniofacial primordia correlates with the onset and progression of facial phenotypes in developing embryos. Next, through morphometric analysis of an allelic series of compound *Ephb1*; *Ephb2*; *Ephb3* receptor gene mutants, we assess the relative contributions of each receptor to craniofacial morphogenesis. Finally, by generating *Efnb1*<sup>+/-</sup> embryos with combinatorial compound loss of receptors, we determine the likely ephrin-B1 signaling partners that drive

CFNS cell segregation. Together, these results indicate that cell segregation occurring in post-migratory mesenchymal populations of the craniofacial primordia is facilitated by numerous ephrin-B1 receptors and is likely the principal driver of cellular interference and severe facial dysmorphogenesis in CFNS.

## Results

### *Ephrin-B1 has a significant effect on embryonic facial shape from E11.5 to E14.5 that mirrors CFNS*

Robust quantitative methods are required to investigate when the effects of mosaic expression of ephrin-B1 on facial morphology first appear, whether the earliest facial shape effects parallel later facial shape effects, how these change in severity over time, and whether phenotypic severity varies between heterozygous females and hemizygous males. We therefore quantified mouse embryo facial shape at progressive stages between E11.5 and E14.5 using geometric morphometrics analysis of landmarks collected on micro-computed tomography ( $\mu$ CT) derived facial surfaces of *Efnb1*<sup>+/ $\Delta$</sup>  and *Efnb1* <sup>$\Delta$ / $\gamma$</sup>  embryos as well as a pooled control sample of *Efnb1*<sup>+/*lox*</sup> and *Efnb1*<sup>*lox*/ $\gamma$</sup>  embryos that we refer to as *Efnb1*<sup>wt</sup>. To determine the significance and relative contribution of facial size (estimated as centroid size) and *Efnb1* genotype in determining facial shape, we carried out a Procrustes ANOVA analysis on E11.5 embryos using a published landmark set [45]. Facial size and *Efnb1* genotype both contribute significantly to facial shape of E11.5 embryos (**Table 1**), explaining approximately 23% and 11% of the facial shape variation, respectively. The significant genotype effect indicates that ephrin-B1 mosaicism or loss influences facial shape as early as E11.5. Genotype-specific effects on facial shape were interrogated to pinpoint specific regions where differences occur. Landmark-specific shape change vectors for both mutant genotypes indicate increased facial width and decreased facial height, with maxillary prominences more posterior in relation to vault landmarks (**Fig. S1**). Overall, there is evidence of reduced anterior outgrowth of and greater lateral distance between the facial prominences in mutant mice.

Given a significant effect of the *Efnb1* genotype on facial shape at E11.5, we performed morphometric analysis on E12.5-E14.5 embryos to determine whether there was a change in the severity or type of facial dysmorphology as the face outgrows. We used a novel landmark set that better captures facial shape at these specific stages (**Fig. S2**). A Procrustes ANOVA analysis with facial size (estimated as centroid size), embryonic age, and *Efnb1* genotype as factors indicated that each contributes significantly to facial shape

164 (Table 2). Additionally, the interaction between age and genotype has a significant effect on facial shape. As  
165 expected for a sample covering multiple embryonic days, facial shape variation correlated with size (i.e.,  
166 allometry) explained 77% percentage of facial shape variation. The significant effect of *Efnb1* genotype  
167 explained almost 7% of facial shape variation. Visualization of landmark vectors illustrating genotype-specific  
168 shape effects indicate overall similarities in the effects of *Efnb1*<sup>ΔY</sup> and *Efnb1*<sup>+Δ</sup> genotypes on facial shape at  
169 E14.5 (Fig. 1A-H). Both mutant genotypes display hypertelorism, represented by an increased relative width  
170 between anterior eye landmarks. They also have a relatively inferior-posterior nose, anterior ear, and latero-  
171 posterior lip corners. Whereas *Efnb1*<sup>ΔY</sup> embryos exhibited shorter faces, the degree of facial shortening was  
172 more extreme in *Efnb1*<sup>+Δ</sup> embryos, as seen by longer vectors at the ear and nose landmarks (Fig. 1H).  
173 Altogether, these shared patterns of dysmorphology indicate hypertelorism and facial shortening in both male  
174 hemizygotes and female heterozygotes.

175 Similarities between E12.5-E14.5 and E11.5 mutant genotype effects suggest a continuity of shape  
176 dysmorphology between E11.5 and E14.5. However, it was important to verify that effects at different  
177 embryonic ages remain parallel after accounting for normal facial growth across this developmental period.  
178 Given that 77% of facial variation of the E12.5-E14.5 sample was explained by size, it was not surprising that  
179 the first principal component (PC) of a principal component analysis (PCA) of facial shape separates  
180 specimens in this sample by embryonic age (Fig. 1I). A multivariate linear model was used to estimate the  
181 allometric component of shape variation that is common across the sample regardless of genotype (Fig. 1J).  
182 The residuals of this regression are interpreted as facial shape after accounting for size related shape  
183 variation. The first PC of a PCA of these facial shape residuals represents a common axis of facial shape  
184 covariation that separates genotypes (Fig. 1K), suggesting major similarities in mutant genotype effects on  
185 facial shape across embryonic ages. Although individual PCs illustrate patterns of facial shape covariation,  
186 they each represent only part of overall covariation. Therefore, we calculated Procrustes distances between  
187 mean control and affected genotype facial shapes to confirm the significance of mean facial shape differences  
188 between genotypes and to estimate the relative severity of facial shape dysmorphology. There were significant  
189 differences in mean facial shape between control and each mutant genotype at all embryonic ages (Table 3).  
190 In addition, within each age, the mean facial shapes of *Efnb1*<sup>+Δ</sup> embryos were always more different from



191 *Efnb1*<sup>wt</sup> controls than were *Efnb1*<sup>Δ $\gamma$</sup>  facial shapes. Finally, the facial shape of both mutant genotypes is more  
192 different from controls at E14.5 than at E12.5, indicating an increase in severity of dysmorphology over this  
193 embryonic period.

194 Based on our analysis, *Efnb1*<sup>+Δ</sup> and *Efnb1*<sup>Δ $\gamma$</sup>  mice display similar types of dysmorphology, with  
195 *Efnb1*<sup>+Δ</sup> females displaying quantitatively greater severity. Similarly, after accounting for normal growth  
196 processes, the major axis of facial shape variation separates genotypes across embryonic ages, indicating  
197 strong similarities in genotype effects that increase in severity across this period of growth. While these general  
198 similarities across age and genotype exist, there are some noted differences in *Efnb1*<sup>+Δ</sup> and *Efnb1*<sup>Δ $\gamma$</sup>  genotype  
199 effects (**Fig. 1A-H**). For example, *Efnb1*<sup>+Δ</sup> embryos display increased relative width of the posterior whisker  
200 margins and a posterior-inferior corner of the whisker region whereas *Efnb1*<sup>Δ $\gamma$</sup>  embryos do not. This suggests  
201 a larger increase in relative width of the midfacial region in the female heterozygotes that is not matched by the  
202 male hemizygotes. In addition, the female heterozygotes display a reduced length of the midline connection  
203 between the whisker pads, that appeared as a midline notch in the upper lip, possibly analogous to a  
204 shortened human filtrum (**Fig. 1A, C, E, G**). These results demonstrate that increased midfacial expansion is  
205 exacerbated in *Efnb1*<sup>+Δ</sup> embryos compared with *Efnb1*<sup>Δ $\gamma$</sup>  embryos, rather than resulting from distinct effects on  
206 additional craniofacial structures.

#### 207 208 *Ephrin-B1-mediated cell segregation occurs in post-migratory neural crest-derived craniofacial mesenchyme*

209 Cell segregation has been proposed to underlie increased severity in heterozygous female CFNS  
210 patients with ephrin-B1 mosaicism. We have previously shown that cell segregation first occurs in the headfold  
211 of E8.5 *Efnb1*<sup>+Δ</sup> embryos prior to NCC emigration [44], suggesting the possibility that early segregation of NCC  
212 progenitors might result in the cellular distribution patterns we observe at later stages. Alternatively, later  
213 segregation within post-migratory NCC-derived populations could result in increased CFNS severity. To  
214 determine when and where cell segregation was occurring, we utilized a ubiquitously expressed X-linked GFP  
215 (XGFP) transgenic allele to monitor normal patterns of X chromosome inactivation (XCI) at distinct stages of  
216 development [44,46,47]. We generated NCC-specific ephrin-B1 mosaic *Efnb1*<sup>+XGFP/lox</sup>; *Sox10-Cre*<sup>Tg/0</sup> embryos  
217 and examined them for segregation at E10.5, after NCC migration has populated the craniofacial



mesenchyme. *Sox10* is expressed throughout NCCs prior to their emigration, and we observed robust recombination throughout the post-migratory NCCs including the maxillary process (MXP) and the frontonasal prominence (FNP) in *Sox10-Cre<sup>Tg/0</sup>; ROSA26<sup>mTmG/+</sup>* reporter embryos (**Fig. S3A, B**). Notably, *Efnb1<sup>+XGFP/lox</sup>*; *Sox10-Cre<sup>Tg/0</sup>* embryos did not exhibit cell segregation in the MXP at E10.5 (**Fig. S3E**) and instead resembled control *Efnb1<sup>+XGFP/lox</sup>* embryos (**Fig. S3C, D**), indicating that cell segregation in migratory NCCs, if it occurs, does not carry through to give rise to segregated populations in post-migratory NCC-derived MXP mesenchyme. Ephrin-B1 expression was low in the MXP at this stage (**Fig. S3C**), consistent with absence of segregation in the MXP of both *Efnb1<sup>+XGFP/lox</sup>; Sox10-Cre<sup>Tg/0</sup>* and *Efnb1<sup>+XGFP/lox</sup>; Actin-Cre<sup>Tg/0</sup>* embryos (**Fig. S3E, G**). Ephrin-B1 expression was higher in the FNP at E10.5 (**Fig. S3D**), consistent with a small amount of patchy distribution of GFP-expressing cells in the FNP of both *Efnb1<sup>+XGFP/lox</sup>; Sox10-Cre<sup>Tg/0</sup>* and *Efnb1<sup>+XGFP/lox</sup>; Actin-Cre<sup>Tg/0</sup>* embryos at this stage (**Fig. S3F, H**). However, whereas E11.5 control *Efnb1<sup>+XGFP/lox</sup>* embryos exhibited a fine-grained mosaic pattern of XGFP expression in the MXP and FNP (**Fig. 2A, B**), in *Efnb1<sup>+XGFP/lox</sup>; Sox10-Cre<sup>Tg/0</sup>* NCC mosaic embryos, distinct segregated patches of ephrin-B1/XGFP expression and non-expression were visible in both structures (**Fig. 2C, D**), indicating that ephrin-B1 drives segregation in the post-migratory NCC-derived mesenchyme.

#### *Post-migratory neural crest cell segregation results in local dysmorphogenesis in craniofacial structures*

The finding that segregation occurs in E11.5 craniofacial mesenchyme demonstrates that ephrin-B1 mediates this process after NCC migration is completed. We next wished to determine whether segregation continues into later stages of craniofacial development. Ephrin-B1 has strong expression in the anterior secondary palate, and loss of function of *EFNB1* can result in cleft palate in both humans and mice [3,4,41,48,49]. We therefore asked whether palatal mesenchyme cells mosaic for ephrin-B1 expression can undergo segregation by utilizing the *Shox2<sup>IresCre</sup>* mouse line, as *Shox2* is expressed in a similar domain to ephrin-B1 in the anterior secondary palate [41,50,51]. Though *Shox2<sup>IresCre</sup>* mediated recombination was observed in neurofilament-expressing maxillary trigeminal ganglion nerve cells at E11.5 (**Fig. S4A, B**), recombination in the anterior palatal mesenchyme was first apparent at E12.5 (**Fig. S4C, D**). Consistent with this timing of *Shox2<sup>IresCre</sup>* onset, we observed no segregation in either genotype at E11.5 (**Fig. S4E, F**) but

245 small patches of segregated ephrin-B1/GFP expression in E12.5 *Efnb1*<sup>+XGFP/lox</sup>; *Shox2*<sup>IresCre/+</sup> embryos (**Fig.**  
246 **S4H**) compared with *Efnb1*<sup>+XGFP/lox</sup> control embryos (**Fig. S4G**). Ephrin-B1 is therefore a driver of segregation  
247 not only in the headfold and NCC progenitor cells, but also in post-migratory craniofacial mesenchyme. These  
248 data demonstrate that ephrin-B1-mediated cell movements continue through development of craniofacial  
249 structures, and segregation within these structures may continually contribute to CFNS dysmorphology.

250 We have demonstrated that differences in facial shape are evident in female *Efnb1*<sup>+Δ</sup> heterozygous  
251 embryos as early as E11.5, but these shape changes continue to develop over time and increase in severity  
252 through E14.5. To investigate how segregation later in development correlates with changes to craniofacial  
253 tissue morphology, we examined embryos with ephrin-B1 mosaicism in specific cell types at E13.5. Control  
254 embryos have strong ephrin-B1 expression in the tips of the anterior palatal shelves and lateral FNP consistent  
255 with the CFNS-like phenotypes we discovered by morphometric analysis, while XGFP is visible in a fine-  
256 grained mosaic pattern in each structure (**Fig. 3A, E**). In full *Efnb1*<sup>+XGFP/Δ</sup> heterozygotes, large ephrin-B1/GFP  
257 expressing and non-expressing patches correlated with aberrant ephrin-B1 expression boundaries, including  
258 irregularities of palatal shelf shape (**Fig. 3B**) and apparent bifurcations of the nasal conchae (**Fig. 3F**). Neural  
259 crest-specific mosaic *Efnb1*<sup>+XGFP/lox</sup>; *Sox10-Cre*<sup>Tg/0</sup> embryos exhibited a similar correspondence between  
260 ephrin-B1/GFP patches and local dysmorphology in both the secondary palatal shelves (**Fig. 3C**) and nasal  
261 conchae (**Fig. 3G**). Interestingly, in palate mesenchyme-specific *Efnb1*<sup>+XGFP/lox</sup>; *Shox2*<sup>IresCre/+</sup> heterozygotes,  
262 small ephrin-B1/GFP expressing and non-expressing patches were apparent in the E13.5 anterior palate  
263 mesenchyme (**Fig. 3D**). These patches appeared somewhat smaller than those in full or NCC-specific mosaic  
264 embryos, and the palatal shelves were overall not as dramatically dysmorphic as *Efnb1*<sup>+XGFP/Δ</sup> heterozygotes,  
265 though local bending occurred at ephrin-B1 expression boundaries with small bumps surrounding the boundary  
266 (**Fig. 3B, D**). No segregation was evident in the FNP of palate mesenchyme-specific *Efnb1*<sup>+XGFP/lox</sup>;  
267 *Shox2*<sup>IresCre/+</sup> heterozygotes, with no local dysmorphology in the nasal conchae (**Fig. 3H**). In total, these data  
268 demonstrate that ephrin-B1 mediates segregation in the post-migratory NCC-derived mesenchyme of two  
269 structures key to CFNS pathology and that these boundaries correlate with tissue structure dysmorphology.

270  
271 *Tissue-specific contributions to CFNS dysmorphology*

272 The expression patterns of ephrin-B1 in the early neural plate, telencephalon and post-migratory  
273 craniofacial neural crest, together with the finding that cell segregation can occur independently in each of  
274 these contexts, led us to ask whether disruption in distinct tissues contributes to CFNS dysmorphology. We  
275 have previously shown that ephrin-B1 mediates segregation in the neural plate neuroepithelium and that  
276 segregation is apparent in the developing brain [44,52]. Apoptosis of neuroepithelial cells is observed together  
277 with a reduction in cranial NCCs leading to abnormal craniofacial development in *Tcof1*<sup>+/-</sup> mutant embryos, a  
278 model of Treacher Collins syndrome [53,54], and changes to the shape of the brain can indirectly cause  
279 changes to facial shape [11,12]. We therefore wondered whether ephrin-B1 mosaicism in the brain could result  
280 in changes to facial shape. *Sox1*<sup>Cre</sup> mediates recombination in the neural plate as early as E8.5 [55], and  
281 crossing to the *ROSA26*<sup>mTmG</sup> reporter revealed widespread recombination throughout the brain at E13.5 (**Fig.**  
282 **S5A**) but none in craniofacial structures such as the palatal shelves and FNP (**Fig. S5B, C**), consistent with a  
283 lack of segregation in the palate or FNP of *Efnb1*<sup>+XGFP/lox</sup>; *Sox1*<sup>Cre/+</sup> embryos at this stage (**Fig. S5D, E**).  
284 Compared with control embryos (**Fig. 4A**), *Efnb1*<sup>+XGFP/lox</sup>; *Sox1*<sup>Cre/+</sup> embryos exhibited robust segregation in the  
285 brain (**Fig. 4C**) that mirrored what we observed in *Efnb1*<sup>+XGFP/Δ</sup> full heterozygous embryos (**Fig. 4B**). We  
286 quantified the gross facial shape effects of brain-specific ephrin-B1 cell segregation in *Efnb1*<sup>+/lox</sup>; *Sox1*<sup>Cre/+</sup>  
287 E14.5 embryos with geometric morphometrics. Procrustes ANOVA analysis indicated that *Efnb1* brain-specific  
288 heterozygosity is not a significant contributor to facial shape variation (**Table 4**). Landmark specific vectors of  
289 *Efnb1*<sup>+/lox</sup>; *Sox1*<sup>Cre/+</sup> genotype effects on facial shape are virtually nonexistent (**Fig. 5A, C**), and the shape of  
290 these specimens overlap substantially with *Efnb1*<sup>wt</sup> littermate controls (**Fig. 5E**). Each of these observations  
291 supports the conclusion that neural tissue-specific *Efnb1* heterozygosity does not impact facial shape.

292 Because neural-specific *Efnb1* heterozygosity does not contribute to CFNS facial dysmorphology, we  
293 quantified the gross facial shape effects of disrupted *Efnb1* expression in NCC-derived tissues. Procrustes  
294 ANOVA analysis indicated that *Efnb1*<sup>+/lox</sup>; *Sox10-Cre*<sup>Tg/0</sup> genotype had a significant influence on facial shape  
295 (**Table 5**). Landmark-specific vectors of the facial shape effects indicated broadly similar directions of shape  
296 change for *Efnb1*<sup>lox/y</sup>; *Sox10-Cre*<sup>Tg/0</sup> hemizygotes and heterozygotes compared with control (**Fig. 5B, D**). These  
297 include hypertelorism, a relatively inferior rhinarium, and relatively anterior ear. The *Efnb1*<sup>+/lox</sup>; *Sox10-Cre*<sup>Tg/0</sup>  
298 heterozygotes show increased width of the posterior whisker margins and a higher midline lip cleft when

299 compared to *Efnb1*<sup>lox/y</sup>; *Sox10-Cre*<sup>Tg/0</sup> hemizygotes. As with the comparison of *Efnb1*<sup>+/ $\Delta$</sup>  and *Efnb1* <sup>$\Delta$ / $\gamma$</sup>   
300 genotypes, the severity of facial shape dysmorphology is lower in *Efnb1*<sup>lox/y</sup>; *Sox10-Cre*<sup>Tg/0</sup> males than in  
301 *Efnb1*<sup>+/ $\Delta$</sup> ; *Sox10-Cre*<sup>Tg/0</sup> heterozygous females (**Fig. 5F; Table 6**). Strong similarities in facial dysmorphology  
302 are apparent between embryos with global disruption of *Efnb1* and those with NCC-specific-loss. However, the  
303 Procrustes distances between affected mice and wildtype mice are lower for the *Sox10-Cre* crosses (**Table**  
304 **3,6**), suggesting a lower severity of facial dysmorphology when cell segregation occurs only in NCC-derived  
305 structures. In summary, these morphometric results quantitatively demonstrate that neural-specific disruption  
306 of *Efnb1* has no effect on facial shape in CFNS dysmorphology, while NCC-specific disruption leads to facial  
307 shape effects that are similar to, but slightly milder than those resulting from global disruption of *Efnb1*  
308 expression.

### 309 *Contributions of EphB receptors to CFNS-like phenotypes and cell segregation*

310  
311 Based on biochemical affinity, EphB1, EphB2 and EphB3 have been proposed to be the principle  
312 receptors for ephrin-B1 [56]. Though it has been documented that loss of EphB2 and EphB3 signaling results  
313 in a cleft palate phenotype [57–59], it is currently unknown which receptors are relevant to which CFNS  
314 phenotypes, and whether global additive or distinct tissue-specific functions are conferred by each receptor. In  
315 order to illuminate the particular Eph-ephrin-B1 interactions that produce CFNS facial dysmorphology, we  
316 collected E14.5 embryos harboring all 27 possible genotypic combinations of *Ephb1*, *Ephb2*, and *Ephb3* null  
317 mutant alleles [58,60,61]. Morphometric analysis was completed to identify the phenotypic influence of single  
318 EphB receptor and combined EphB receptor loss. Procrustes ANOVA analysis indicates that genotypes of  
319 each EphB receptor have significant effects on E14.5 embryo facial shape (**Table 7**). The proportion of facial  
320 shape variation explained by variation in the *Ephb1* null mutation is 1%, while *Ephb2* genotype explains 6%  
321 and *Ephb3* genotype explains 10% (Rsq values). Specimens with more null alleles across all three receptors  
322 tended to have facial shapes more similar to *Efnb1*<sup>+/ $\Delta$</sup>  and *Efnb1* <sup>$\Delta$ / $\gamma$</sup>  specimens, but each receptor contributed to  
323 facial shape change to a different extent (**Fig. 6A**). For example, specimens that were homozygous null for  
324 *Ephb1* often had facial shapes similar to *Efnb1*<sup>wt</sup> mice, while specimens that were homozygous null for *Ephb2*  
325 usually had facial shapes more similar to *Efnb1* <sup>$\Delta$ / $\gamma$</sup>  mice (**Fig. 6B**). So, while genotype of each receptor was

326 associated with a significant shape effect, the facial shape effect of *Ephb1* genotype explained less facial  
327 shape variation than *Ephb2* or *Ephb3* genotypes and was associated with less severe phenotypic effects.

328 Interactions between multiple *Ephb* receptor genotypes further explained facial shape variation across  
329 this triple null series. For example, some of the variation across specimens that were homozygous null for  
330 *Ephb1* resulted from heterozygosity of other receptors. *Ephb1* homozygotes with no other null *Ephb* alleles had  
331 facial shapes like *Efnb1<sup>wt</sup>* mice, indicating weak or no independent impact of *Ephb1*. *Ephb1<sup>-/-</sup>; Ephb2<sup>+/-</sup>*  
332 embryos also displayed wildtype-like phenotypes; however, *Ephb1<sup>-/-</sup>; Ephb2<sup>+/-</sup>; Ephb3<sup>+/-</sup>* exhibited phenotypes  
333 more similar to *Efnb1<sup>ΔY</sup>* mutant embryos (**Fig. 6D**). *Ephb3<sup>-/-</sup>* null mutants exhibited an intermediate facial  
334 phenotype with the severity of dysmorphology increased by *Ephb2* heterozygosity (**Fig. 6E**). While many  
335 specimens that were homozygous null for one receptor gene showed wildtype-like facial shape, most  
336 specimens that were homozygous null for two receptor genes displayed more severe dysmorphology (**Fig.**  
337 **6C**). However, the embryos that were homozygous null for both *Ephb1* and *Ephb3* clustered into two groups  
338 along major axes (PCs) of facial shape variation. This separation of specimens was based on whether these  
339 specimens were also heterozygous for *Ephb2* (**Fig. 6F**), indicating that having two wild-type copies of *Ephb2* in  
340 embryos without EphB1 or EphB3 function can lead to a notably milder facial phenotype.

341 We have previously demonstrated that loss of forward signaling through EphB2 and EphB3 resulted in  
342 a loss of cell segregation in the neural plate of *Efnb1<sup>+Δ</sup>* embryos at E8.5. Because ephrin-B1 cell segregation  
343 occurring within the post-migratory NCC-derived mesenchyme appears to drive CFNS dysmorphology, we  
344 genetically tested which receptors were required for cell segregation in the secondary palate, FNP and brain.  
345 We generated compound *Efnb1<sup>+Δ</sup>* mutant embryos also harboring loss of function of different combinations of  
346 *Ephb1*, *Ephb2* and *Ephb3* alleles and analyzed cell segregation at E13.5 by ephrin-B1 immunostaining.  
347 Robust segregation with large segregated patches of ephrin-B1 positive and negative cells was apparent in the  
348 secondary palate and FNP mesenchyme of *Efnb1<sup>+Δ</sup>* embryos with most combinations of EphB receptor  
349 genotypes (**Fig. 7A-F; Fig. S6A-F**). Strikingly, *Efnb1<sup>+Δ</sup>; Ephb1<sup>+/-</sup>; Ephb2<sup>-/-</sup>; Ephb3<sup>-/-</sup>* mutant embryos exhibited  
350 reduced segregation in the craniofacial mesenchyme with smaller ephrin-B1 positive patches and more  
351 intermixing resulting in a more even distribution of ephrin-B1 expressing and non-expressing cells (**Fig. 7G;**  
352 **S6G**), and *Efnb1<sup>+Δ</sup>; Ephb1<sup>-/-</sup>; Ephb2<sup>-/-</sup>; Ephb3<sup>-/-</sup>* embryos exhibited the most dramatic reduction in cell

353 segregation, though regions of ephrin-B1 negative cells were still observed to cluster together (**Fig. 7H; S6H**).  
354 Even complete loss of EphB1, EphB2 and EphB3 was not sufficient to completely abrogate ephrin-B1-  
355 mediated cell segregation in the palate and FNP, suggesting that additional receptors may contribute to cell  
356 segregation in this context. In the brain, a somewhat different priority of receptor requirement was observed.  
357 Again, cell segregation was apparent in most *Efnb1<sup>+Δ</sup>*; *Ephb1-3* compound mutant embryos, though the extent  
358 of intermixing and distribution of patches was different with different receptor combinations (**Fig. S7**). Notably,  
359 EphB1 seems to play a more important role in cell segregation in the brain, as *Efnb1<sup>+Δ</sup>*; *Ephb1<sup>-/-</sup>*; *Ephb2<sup>-/-</sup>*;  
360 *Ephb3<sup>-/-</sup>* embryos exhibited dramatic loss of cell segregation (**Fig. S7E**) that was similar to that observed in  
361 *Efnb1<sup>+Δ</sup>*; *Ephb1<sup>-/-</sup>*; *Ephb2<sup>-/-</sup>*; *Ephb3<sup>-/-</sup>* embryos (**Fig. S7H**).

## 363 Discussion

364 From its description as a subgroup of frontonasal dysplasia that affects females more severely than  
365 males and the discovery of its X-linked inheritance, CFNS etiology has been mysterious [3,62]. Mouse  
366 knockout studies greatly facilitated the identification of *EFNB1* as the responsible gene, and implicated the  
367 involvement of Eph-ephrin cell segregation [4,5,41,42]. Aberrant ephrin-B1-mediated cell segregation, or  
368 “cellular interference,” is a likely causative mechanism for producing craniofacial and skeletal phenotypes in  
369 CFNS patients [37,39,42–44]. It has remained difficult, however, to definitively demonstrate the connection  
370 between cell segregation and craniofacial dysmorphogenesis.

371 Using morphometric analysis in a wide range of mouse genetic models, we have determined the facial  
372 changes associated with CFNS pathogenesis and their timing. Significantly wider and shorter faces in *Efnb1*  
373 mutant mice were noted as early as E11.5 and increased in severity by E14.5. During this period, which  
374 approximately corresponds to weeks 5-8 in human embryonic development, both *Efnb1<sup>ΔY</sup>* null hemizygous and  
375 *Efnb1<sup>+Δ</sup>* mosaic heterozygous embryos exhibit changes in facial shape relative to control embryos, but the  
376 changes are more pronounced in mosaic heterozygous embryos, analogous to the increased severity seen in  
377 heterozygous female CFNS patients. The quantification of phenotypic shape changes in these embryos  
378 revealed that dysmorphology analogous to CFNS phenotypes seen in humans with *EFNB1* mutations arose  
379 very early during facial morphogenesis, including hypertelorism, midfacial hypoplasia, and higher severity of



dysmorphology in females. Specifically, a larger increase in relative width of the midfacial region in the female *Efnb1*<sup>+Δ</sup> heterozygotes is not matched by the male *Efnb1*<sup>ΔY</sup> hemizygotes. In addition, the degree of facial shortening in the females is more extreme, as seen by longer vectors at the ear and nose landmarks. Finally, the female heterozygotes display a much higher point of fusion between the right and left sides of the upper lip that may be secondary to a wider nasal region. These results indicate that increased midface expansion, arising early in development and not as a consequence of craniosynostosis, underlies more severe phenotypes in female heterozygotes. The strong similarities present in both mutant genotypes indicate that the more severe craniofacial phenotype noted in female heterozygotes are based in a quantitative extension of dysmorphologies shared with male hemizygotes. Given that heterozygotes display cell segregation and hemizygotes do not, it might be expected that *Efnb1*<sup>+Δ</sup> phenotypes would represent a combination of *Efnb1*<sup>ΔY</sup> and qualitatively novel shape effects that are specific to the heterozygotes. However, our results support a fundamentally different situation where hemizygotes and heterozygotes largely exist along a shared quantitative spectrum of facial dysmorphology.

To begin to determine how cell segregation relates to more severe CFNS phenotypes, it is necessary to understand both when (in developmental time) and where (in relevant tissues to CFNS) cell segregation occurs. By generating tissue-specific mosaicism for ephrin-B1, we find that in addition to our previously-documented early wave of cell segregation that occurs in the neuroepithelium, cell segregation also occurs independently in the post-migratory NCCs of the craniofacial mesenchyme. Indeed, neural plate-stage cell segregation does not appear to carry through NCC migration, because in *Efnb1*<sup>+Δ</sup> embryos, E10.5 post-migratory NCC-derived mesenchyme did not exhibit cell segregation. Instead, ephrin-B1 mosaicism within NCCs drove robust cell segregation after E11.5 upon the onset of ephrin-B1 expression in this tissue, and mosaicism induced later in the palatal shelf mesenchyme was also able to drive cell segregation. These data underscore that there is not one common timepoint, or even cell type, for ephrin-B1 cell segregation, but rather ephrin-B1 mosaicism can mediate segregation in a wide range of contexts to give rise to the CFNS spectrum of phenotypes. The conserved cellular mechanisms that have such power across dramatically different cell types and developmental time are not yet known. Nevertheless, based on the timing of cell segregation we document here, together with the timing of quantitative shape changes in *Efnb1* mutant embryos, we infer that



407 CFNS is not caused by defects in NCC migration as previously suggested, but rather reflects a role for *Efnb1*  
408 in shaping the craniofacial primordia following migration. Notably, we found that *Efnb1*<sup>+/ $\Delta$</sup>  mutants exhibit  
409 changes in tissue shape such as bending, folding and bifurcations in the secondary palate and FNP that  
410 correlated with ectopic ephrin-B1 expression boundaries. How exactly local dysmorphology exacerbates  
411 phenotypic severity is uncertain, but it may be that the ephrin-B1 expression pattern constrains the regions of  
412 greatest dysmorphology which then leads to stereotypical CFNS face shape changes. Additionally, these  
413 findings may suggest the existence of previously unappreciated tissue boundaries that exist in the craniofacial  
414 mesenchyme that are lost in *Efnb1* <sup>$\Delta$ / $\gamma$</sup>  hemizygous males, but ectopically imposed in *Efnb1*<sup>+/ $\Delta$</sup>  embryos. Further  
415 studies will be needed to determine how these aberrant boundaries and/or disruption of boundary maintenance  
416 contribute to craniofacial phenotypes.

417 Although segregation occurs dramatically in neural precursor cells at the neural plate and is present in  
418 the brains of *Efnb1*<sup>+/ $\Delta$</sup>  embryos later in development, restriction of ephrin-B1 mosaicism to neural progenitor  
419 cells in *Efnb1*<sup>+/*lox*</sup>; *Sox1*<sup>Cre/+</sup> embryos does not result in changes to craniofacial structures or changes to face  
420 shape, although segregation in the brain remains equally robust in these embryos. Although previous studies  
421 have shown that changes to the structure of the brain can alter the shape of the face [11,12], we demonstrate  
422 that this is not the case for the developmental etiology of craniofacial dysmorphology in CFNS. This is  
423 somewhat surprising, given 1) the high level of expression of ephrin-B1 in the developing brain and 2) dramatic  
424 disruptions of neuroepithelium morphogenesis reported in *Efnb1*<sup>+/ $\Delta$</sup>  mouse embryos [52]. Rather, tissue-  
425 specific mosaicism in NCC-derived facial tissues leads to facial dysmorphology that is similar in nature to the  
426 effects of global mosaicism. There is overlap in the range of facial phenotypes displayed by *Efnb1*<sup>+/ $\Delta$</sup>  and  
427 *Efnb1*<sup>+/*lox*</sup>; *Sox10-Cre*<sup>Tg/0</sup> embryos along two major axes of facial shape variation. However, the average facial  
428 shape of *Efnb1*<sup>+/ $\Delta$</sup>  mice is more different from wildtype facial shape than that of *Efnb1*<sup>+/*lox*</sup>; *Sox10-Cre*<sup>Tg/0</sup> mice,  
429 which we interpret as greater severity of facial dysmorphology. This difference suggests that NCC-specific  
430 *Efnb1* mosaicism does not account for all of the facial dysmorphology noted in *Efnb1*<sup>+/ $\Delta$</sup>  mice. There are  
431 multiple possible reasons for this. First, it is possible that mosaicism in other tissues may exacerbate  
432 dysmorphology that is primarily driven by NCC-specific mosaicism. Potential interacting tissues include  
433 mesoderm-derived cell populations that give rise to cranial base skull bones. It is possible that a reduction in

cranial base bone length may also contribute to increased apparent facial shortening [24]. It is also possible that neural tissue-specific changes may exacerbate facial dysmorphology even if neural tissue-specific changes are not their primary driver.

As a signaling partner for EphB receptor tyrosine kinases, ephrin-B1 has complex signaling mechanisms with multiple possible receptors, as well as proposed receptor-independent functions [33,63,64]. Quantitative analysis of face shape in a triple compound mutant series null for different combinations of *Ephb1*, *Ephb2*, and *Ephb3* provides the first analysis of the particular signaling interactions that are critical for normal face shape development relevant to CFNS. *Ephb1* homozygous null mutation contributes little to facial dysmorphology when compared to the other receptors. *Ephb2*, in particular, appears critical for normal facial development. Although homozygous loss of *Ephb3* led to intermediate dysmorphology, the homozygous loss of *Ephb2* led to dysmorphology similar in nature to that seen in *Efnb1<sup>Δ/Y</sup>* embryos and similar to the dysmorphology noted in embryos with homozygous compound loss of function of all three receptors. *Ephb2<sup>+/-</sup>*; *Ephb3<sup>+/-</sup>* compound mutants exhibited genetic interaction, displaying dysmorphology that was absent in either *Ephb2<sup>+/-</sup>* or *Ephb3<sup>+/-</sup>* individual mutants. In summary, the range of variation in this sample indicates that the loss of EphB receptors leads to facial phenotypes like that noted in *Efnb1<sup>Δ/Y</sup>* mice, although *Ephb2* genotype appears to have the most pronounced effect, particularly in combination with *Ephb3*, while *Ephb1* has a minimal effect. Loss of all three EphB receptors did not recapitulate the severity of the *Efnb1<sup>+Δ</sup>* phenotypes. This is consistent with the observation that XCI-driven mosaicism followed by cell segregation underlies severity of phenotypes. Complete loss of EphB receptors does not have a mosaic effect, and extensive ephrin-B1-mediated cell segregation in the craniofacial mesenchyme requires receptor expression. Though complete loss of EphB1, EphB2, and EphB3 resulted in a dramatic reduction in cell segregation in *Efnb1<sup>+Δ</sup>*; *Ephb1<sup>-/-</sup>*; *Ephb2<sup>-/-</sup>*; *Ephb3<sup>-/-</sup>* embryos, segregation was not completely abolished, suggesting that additional receptors may play a role. Several EphA receptors are strongly expressed in the secondary palate mesenchyme, including EphA4, which was reported to interact with ephrin-B1 when overexpressed in Cos7 cells [65,66].

Our improved understanding of the timing and receptor partners involved in cell segregation and craniofacial morphogenesis might ultimately be useful for designing molecular therapies that block Eph/ephrin cell segregation, thus potentially ameliorating more severe CFNS phenotypes. Though we have mainly

461 focused on the relative severity of *Efnb1*<sup>+/ $\Delta$</sup>  mutant phenotypes, it is important to stress, however, that *Efnb1* <sup>$\Delta$ / $\gamma$</sup>   
462 and *Ephb1*; *Ephb2*; *Ephb3* compound mutant mouse embryos exhibit significant craniofacial  
463 dysmorphogenesis that includes hypertelorism, frontonasal dysplasia, and cleft secondary palate [8,41,57–59].  
464 Though cleft lip and palate are relatively uncommon in CFNS patients relative to other craniofacial features, a  
465 recent genome-wide association study suggested that the *EFNB1* locus may also be relevant to non-syndromic  
466 cleft lip with or without cleft palate, which underscores the importance of this pathway in normal development  
467 as well as in X-linked CFNS [67].

## 468 **Materials and Methods**

469 *Mouse lines.* All animal experiments were performed in accordance with the protocols of the University of  
470 California, San Francisco Institutional Animal Care and Use Committee. Mice were socially housed under a  
471 twelve-hour light-dark cycle with food and water *ad libitum*. If single housing was required for breeding  
472 purposes, additional enrichment was provided. All alleles used for the experiments herein have been  
473 previously described. All mice were backcrossed and maintained on a congenic C57BL/6J genetic background.  
474 *Efnb1*<sup>lox</sup>, MGI: 3039289 [8]; *X*<sup>GFP</sup>, MGI: 3055027 [46]; *Actin-Cre*, MGI: 2176050 [68]; *Sox10-Cre*, MGI: 3586900  
475 [69]; *Shox2*<sup>IresCre</sup>, MGI: 5567920 [50]; *Sox1*<sup>Cre</sup>, MGI: 3807952 [55]; *ROSA26*<sup>mTmG</sup>, MGI: 3716464 [70]; *Ephb1*,  
476 MGI: 2677305 [61]; *Ephb2*, MGI: 2149765 [60]; *Ephb3*, MGI: 2149669 [58]. For a full description of genetic  
477 crosses used to generate embryos; strain background, sex, and stage of embryos; and numbers of embryos  
478 analyzed, please refer to **Table S1**.

480  
481 *Generation of embryos for analysis of cell segregation.* An X-linked beta-actin GFP transgene (XGFP) that  
482 demonstrates a fine-grained mosaic pattern of GFP expression after random XCI in female embryos [42,46,47]  
483 was used to visualize XCI as well as cell segregation in all mosaic embryos. Full ephrin-B1 heterozygotes were  
484 generated using *Actin-Cre* mice [68]. *Actin-Cre*<sup>Tg/0</sup>; *X*<sup>GFP</sup>/*Y* male mice were crossed to *Efnb1*<sup>lox/lox</sup> female mice to  
485 generate both *Efnb1*<sup>+XGFP/lox</sup>; *Actin-Cre*<sup>Tg/0</sup> and *Efnb1*<sup>+XGFP/lox</sup> control embryos (referred to in the text and figures  
486 as *Efnb1*<sup>+XGFP/ $\Delta$</sup>  and *Efnb1*<sup>+XGFP/lox</sup>, respectively). Embryos mosaic for ephrin-B1 expression specifically in the  
487 neural crest cell (NCC) lineage were generated using *Sox10-Cre* mice [69], which were crossed to *Efnb1*<sup>lox/lox</sup>

488 female mice to generate both  $Efnb1^{+XGFP/lox}$ ;  $Sox10-Cre^{Tg/0}$  heterozygous mutant and  $Efnb1^{+XGFP/lox}$  control  
489 embryos. Embryos mosaic for ephrin-B1 expression specifically in the palate mesenchyme were generated  
490 using  $Shox2^{IresCre}$  [50].  $Shox2^{IresCre/+}$ ;  $X^{GFP}/Y$  male mice were crossed to  $Efnb1^{lox/lox}$  female mice to generate both  
491  $Efnb1^{+XGFP/lox}$ ;  $Shox2^{IresCre/+}$  heterozygous mutant and  $Efnb1^{+XGFP/lox}$  control embryos. Embryos mosaic for  
492 ephrin-B1 expression in early neural progenitor cells were generated using  $Sox1^{Cre}$ , which drives  
493 recombination in neural plate neuroepithelial cells at E8.5 [55].  $Sox1^{Cre/+}$ ;  $X^{GFP}/Y$  male mice were crossed to  
494  $Efnb1^{lox/lox}$  female mice to generate both  $Efnb1^{+XGFP/lox}$ ;  $Sox1^{Cre/+}$  heterozygous mutant and  $Efnb1^{+XGFP/lox}$  control  
495 embryos. For EphB receptor compound mutants,  $Efnb1^{lox/y}$ ;  $Ephb1$ ;  $Ephb2$ ;  $Ephb3$  male mice carrying differing  
496 numbers of EphB mutant receptor alleles were crossed to  $EphB1$ ;  $EphB2$ ;  $EphB3$ ;  $Actin-Cre^{Tg/0}$  female mice  
497 carrying differing numbers of EphB mutant alleles to generate  $Efnb1^{+/Δ}$  embryos with various combinations of  
498 EphB1-3 mutations (**Table S1**).

499  
500 *Immunofluorescence.* Embryos were fixed in 4% PFA in PBS, dehydrated through sucrose, embedded in OCT,  
501 and frozen in dry ice/ethanol. 12 μm sections were cut using an HM550 (Thermo Scientific) or a CM1900  
502 (Leica) cryostat. Slides were washed with PBS, blocked in 5% normal donkey serum (Jackson  
503 ImmunoResearch) and 0.1% Triton-X-100 in PBS, incubated in primary antibody overnight at 4°C, washed with  
504 PBS, and incubated in secondary antibody at room temperature (for antibody information, please refer to **Table**  
505 **8**). Slides were counterstained in DAPI (Millipore) in PBS and coverslips were mounted on slides using  
506 Aquamount (Thermo Scientific) for imaging. Images were obtained on an Axio Imager.Z2 upright microscope  
507 using an AxioCamMR3 camera and AxioVision Rel.4.8 software (Zeiss).

508  
509 *Morphometrics specimen and data acquisition.* Embryos were collected at embryonic days E11.5, E12.5,  
510 E13.5, and E14.5. Embryos were fixed and stored in a mixture of 4% PFA and 5% glutaraldehyde in PBS. After  
511 approximately an hour soaking in Cysto-Conray II (Liebel-Flarsheim Canada), micro-computed tomography  
512 (μCT) images of embryo heads were acquired with a Scanco μ35 at the University of Calgary or a Scanco μ40  
513 at Stony Brook University with 45kV/177μA for images of 0.012 mm<sup>3</sup> voxel size. All facial landmarks were  
514 collected on minimum threshold based ectodermal surfaces (downsampled x2) from the μCT images in Amira

(Thermo-Fisher). Because of striking changes in the morphology of the face between E11.5 and E14.5, two different landmark sets were required to quantify facial shape across this period. Previously defined ectodermal landmarks [45], minus those previously identified as problematic (i.e. landmarks 2, 7(24), 10(27), 13(30), 17(34), 18(35), 21(38), 22), were used to quantify facial form of E11.5 embryos. A modified and reduced version of this published landmark set was developed to allow for comparison of ectodermal facial form between E12.5 and E17.5, which we used to quantify facial form of our E12.5, E13.5, and E14.5 embryos (**Fig. S2; Table 9**).

### *Morphometric analysis of Efnb1 constitutive mutant embryos*

Facial landmarks were collected from hemizygote males ( $Efnb1^{\Delta/Y}$ ), heterozygote females ( $Efnb1^{+/Δ}$ ), and control specimens that were sometimes littermates of affected specimens and sometimes came from separate crosses of *Actin-Cre* and C57BL/6J mice. Separate geometric morphometric analyses were carried out for E11.5 specimens and a combination of E12.5-E14.5 specimens using geomorph [71] in R Statistical Software (R Developmental Core Team, 2008). The procedure is described for the E12.5-E14.5 sample first. Procrustes superimposition was performed on landmarks to align each specimen and remove scale from analysis. Procrustes ANOVA analysis, with permutation-based tests for significance, was used to determine whether size (numeric; centroid size), genotype (factor;  $Efnb1^{+/Δ}$ ,  $Efnb1^{\Delta/Y}$ ,  $Efnb1^{wt}$ ), age (numeric; 12.5, 13.5, 14.5) and their interactions have a significant influence on facial shape ( $\alpha=0.05$ ). We visualized the effects of  $Efnb1^{+/Δ}$  and  $Efnb1^{\Delta/Y}$  genotypes on facial shape by plotting differences between predicted genotype-specific shapes estimated from the Procrustes ANOVA multivariate linear model (assuming E14.5 age and average E14.5 centroid size). Given the strong changes in facial shape that normally occur between E12.5 and 14.5, we completed a multivariate regression of facial shape on centroid size to estimate allometry and used the rescaled residuals of that regression as “allometry-corrected” coordinates for further analysis. Principal component analyses of coordinate values were completed both before and after “allometry correction” to visualize patterns of specimen clustering along major axes of facial shape covariation within the sample. Procrustes distances between mean control and affected facial shapes were calculated from residual landmark coordinates at each age to determine whether genotypes displayed significantly different facial shapes.

542 Significance was determined by comparing Procrustes distances to 95% age-specific confidence intervals that  
543 were estimated with 1000 permutations of distances between two randomly selected control groups of 15  
544 specimens. Geometric morphometric analysis of the E11.5 sample was completed in the same way, except  
545 without age as a factor in the Procrustes ANOVA analysis and without allometry correction, because only one  
546 age was under analysis. The Procrustes distance values, Procrustes ANOVA output values, and other values  
547 are not directly comparable between the E11.5 and the E12.5-E14.5 analyses, because a different set of  
548 landmarks undergoing independent Procrustes superimpositions were completed for each age group.  
549 However, comparisons of the type of facial shape changes associated with genotype within each age group  
550 are valuable to determine if phenotypes are affected similarly in both age groups.

551  
552 *Facial shape comparison of Efnb1 tissue-specific and EphB series mutant embryos.* E14.5 embryos were  
553 collected from crosses of *Sox10-Cre<sup>Tg/0</sup>* or *Sox1<sup>Cre/+</sup>* males with *Efnb1<sup>lox/lox</sup>* females to generate embryos to  
554 quantify the effects of tissue specific *Efnb1* loss on facial shape (**Table S1**). We intercrossed compound  
555 *EphB1; EphB2; EphB3* mutants to generate E14.5 embryos with all possible combinations of *EphB1*, *B2*, and  
556 *B3* null allele genotypes to compare the effects of receptor loss with the effects of *Efnb1* ligand loss. Separate  
557 Procrustes ANOVA analyses were used to identify significant effects of size (numeric; centroid size) and  
558 genotype (factor, *Cre; Efnb1<sup>+/lox</sup>*, *Cre; Efnb1<sup>lox/Y</sup>*, *Efnb1<sup>+/lox</sup>*) for the *Sox1<sup>Cre</sup>* and *Sox10-Cre* samples. Procrustes  
559 ANOVA analysis of the EphB series was completed using the number of null alleles for each EphB receptor as  
560 separate numeric factors. To visualize the facial shape effects of these genotypes across E14.5 specimens in  
561 relation to full *Efnb1<sup>+Δ</sup>* or *Efnb1<sup>Δ/Y</sup>* genotype effects, each specimen was projected onto principal component  
562 axes defined with an E14.5 *Efnb1<sup>+Δ/-</sup>*, *Efnb1<sup>Δ/Y/-</sup>*, or *Efnb1<sup>wt</sup>*-specific PCA. The 95% confidence intervals of the  
563 facial shape of *Efnb1<sup>+Δ</sup>*, *Efnb1<sup>Δ/Y</sup>*, and *Efnb1<sup>wt</sup>* genotypes serve as a standard visual baseline across many of  
564 the associated figure panels. Procrustes distances between wildtype specimens and each *Efnb1* mutant  
565 genotype were calculated to determine whether tissue-specific expression of *Efnb1* null mutations led to  
566 significant facial dysmorphology.

## 567 568 **Acknowledgements**

569 We are grateful for the advice and generous support received from Dr. Benedikt Hallgrímsson during the early  
570 phases of this research project. We acknowledge Dr. Francis Smith for collecting landmarks for E11.5  
571 morphometrics comparisons and to Isabel Mormile for collecting some of the  $\mu$ CT images. Thanks go to Ace  
572 Lewis and Dr. Camilla Teng for contributing images for use in the model figure. Outstanding technical  
573 genotyping support was provided by Fang-Shiuan Leung. We are grateful to our colleagues Dr. Ralph  
574 Marcucio and Dr. Licia Selleri for their insightful comments. This work was supported by R01DE023337 from  
575 NIH/NIDCR to J.O.B.

576



## 577 Figures

578 **Figure 1. *Efnb1* mutant embryos have quantitative facial shape effects that mimic CFNS. (A-F)** Facial  
579 landmarks identified on representative *Efnb1*<sup>wt</sup> (A-B), *Efnb1*<sup>Δ/γ</sup> (C-D), and *Efnb1*<sup>+Δ</sup> (E-F) E14.5 specimen  
580 surfaces. (G-H) Common facial shape effects of *Efnb1*<sup>Δ/γ</sup> (cyan) and *Efnb1*<sup>+Δ</sup> (red) genotypes on facial  
581 landmark position, compared to *Efnb1*<sup>wt</sup> (black) from the (G) anterior and (H) lateral views. The lengths of  
582 these shape difference vectors are magnified three times to allow for easy comparison. Thin black lines are  
583 placed for anatomical reference. (I-L) Plots to illustrate facial shape variation of *Efnb1*<sup>Δ/γ</sup> (cyan) and *Efnb1*<sup>+Δ</sup>  
584 (red) and *Efnb1*<sup>wt</sup> (black) genotypes across E12.5 (triangle), E13.5 (square), and E14.5 (circle). (I) Facial  
585 shape variation across E12.5-14.5 specimens is illustrated along the first two principal components. (J) A linear  
586 relationship exists between facial size and a multivariate summary score of facial shape, which indicates a  
587 strong allometric effect across this period of development. (K) The first two principal components of facial  
588 shape after accounting for this developmental allometry illustrate a common genotype effect across ages. (L)  
589 Facial shape variation of only E14.5 specimens, with 95% confidence intervals, illustrates similarities in the  
590 effect of both genotypes compared to control specimens.

591  
592 **Figure 2. Post-migratory neural crest cells mosaic for ephrin-B1 expression undergo cell segregation**  
593 **in craniofacial primordia. (A, A')** Immunostaining E11.5 frontal sections for ephrin-B1 (magenta) and GFP  
594 (green) reveals that *Efnb1*<sup>+XGFP/lox</sup> control embryos demonstrate a fine-grained mosaic pattern of XGFP  
595 expression, and ephrin-B1 expression is strong in the maxillary prominences and (B, B') the lateral FNP. (C,  
596 C') *Efnb1*<sup>+XGFP/Δ</sup>; *Sox10-Cre*<sup>Tg/0</sup> embryos with ephrin-B1 mosaicism specifically in NCCs show dramatic cell  
597 segregation in the maxillary prominences and (D, D') the lateral FNP, indicating that NCCs are capable of  
598 undergoing ephrin-B1-mediated segregation resulting in aberrant ephrin-B1 expression patterns in craniofacial  
599 mesenchyme. Scale bars, 200 μm.

600  
601 **Figure 3. Craniofacial mesenchyme cell segregation correlates with local dysmorphology in the**  
602 **secondary palate and FNP. (A, A')** Immunostaining E13.5 frontal sections for ephrin-B1 (magenta) and GFP  
603 (green) reveals that ephrin-B1 protein is strongly expressed in the anterior-middle palatal shelves. Evenly

distributed and intermixed XGFP expressing cells are apparent in control *Efnb1*<sup>+XGFP/lox</sup> embryos. **(B, B')** Cell segregation is visible in the palatal shelves of *Efnb1*<sup>+XGFP/Δ</sup> embryos as large patches of ephrin-B1 and GFP expression in these structures. The palatal shelves are also smaller and dysmorphic, with changes in shape occurring at boundaries between ephrin-B1 expressing and non-expressing domains (white arrow). **(C, C')** Generation of ephrin-B1 mosaicism specifically in neural crest cells using Sox10-Cre results in dramatic cell segregation in *Efnb1*<sup>+XGFP/Δ</sup>; Sox10-Cre<sup>Tg/0</sup> palatal shelves, which are smaller and dysmorphic, with regions of dysmorphogenesis correlating with ephrin-B1 expression boundaries (yellow arrow). **(D, D')** Ephrin-B1 mosaicism in Sox2<sup>IresCre</sup>-expressing cells results in cell segregation in *Efnb1*<sup>+XGFP/Δ</sup>; Sox2<sup>IresCre/+</sup> palatal shelves. Areas of dysmorphogenesis are visible at the interface between ephrin-B1 expression and non-expression domains (blue arrow). **(E, E')** Immunostaining of frontal sections of control *Efnb1*<sup>+XGFP/lox</sup> embryos at E13.5 for ephrin-B1 (magenta) demonstrates strong expression in the LNP lateral to the nasal concha of the anterior frontonasal process (FNP). XGFP (green)-expressing cells are evenly distributed and intermixed with GFP non-expressing cells. **(F, F')** In *Efnb1*<sup>+XGFP/Δ</sup> embryos with ubiquitous mosaicism for ephrin-B1 expression, cell segregation is evident throughout the anterior FNP, and bifurcation of the nasal concha occurs at an aberrant ephrin-B1 expression boundary (white arrowhead). **(G, G')** Generation of ephrin-B1 mosaicism specifically in neural crest cells in *Efnb1*<sup>+XGFP/Δ</sup>; Sox10-Cre<sup>Tg/0</sup> embryos results in cell segregation visible throughout the anterior FNP and bifurcation of the nasal concha visible at ephrin-B1 expression boundaries (yellow arrowhead). **(H, H')** Restriction of ephrin-B1 mosaicism to post-migratory neural crest cells using Sox2<sup>IresCre</sup> does not cause cell segregation or dysmorphology in the nasal concha of the anterior FNP, as Sox2 is not expressed in this region. Scale bars, 200 μm.

**Figure 4. Ephrin-B1 mosaicism in neural progenitors produces cell segregation in the brain. (A, A')**

Immunostaining of E13.5 coronal sections for ephrin-B1 (magenta) and GFP (green) shows high ephrin-B1 expression, with an absence of cell segregation as shown by the fine-grained mosaic pattern of XGFP expression. **(B, B')** In *Efnb1*<sup>+XGFP/Δ</sup> embryos with ubiquitous mosaicism for ephrin-B1 expression, cell segregation is evident throughout the brain as large patches of ephrin-B1 and GFP expression. **(C, C')** Generation of ephrin-B1 mosaicism specifically in neural progenitor cells using Sox1<sup>Cre</sup> results in dramatic

631 segregation throughout the brain of E13.5 *Efnb1*<sup>+XGFP/Δ</sup>; *Sox1*<sup>Cre/+</sup> embryos, visible as large patches of ephrin-  
632 B1 and GFP expression.

633

634 **Figure 5. Disruption of *Efnb1* in NCCs results in face shape changes but disruption in brain does not.**

635 **(A-D)** Genotype-specific facial shape effects are plotted between predicted E14.5 facial shape landmark  
636 positions for *Efnb1*<sup>wt</sup> (grey points) and *Efnb1*<sup>+lox</sup>; *Sox1*<sup>Cre/+</sup> (orange points) from the **(A)** anterior and **(C)** lateral  
637 views and between *Efnb1*<sup>wt</sup> (grey points), *Efnb1*<sup>+lox</sup>; *Sox10-Cre*<sup>Tg/0</sup> (orange points), and *Efnb1*<sup>lox/Y</sup>; *Sox10-*  
638 *Cre*<sup>Tg/0</sup> (blue points) from the **(B)** anterior and **(D)** lateral views. The lengths of these shape difference vectors  
639 are magnified three times to allow for easy comparison of shape effects. Thin black lines are placed for  
640 anatomical reference. **(E-F)** Facial shape variation of indicated genotypes is projected along the first two  
641 principal components from Fig. 1L for direct comparison of *Sox1*<sup>Cre</sup> and *Sox10-Cre* *Efnb1* genotype effects with  
642 full *Efnb1* genotype effects. The large ovals are the 95% confidence intervals from Fig. 1L.

643

644 **Figure 6. Distinct EphB receptors exhibit additive non-equal quantitative effects on face shape.**

645 A sample of all possible *Ephb1*, *Ephb2*, and *Ephb3* null allele genotype combinations displays wide facial  
646 variation across the first two principal component axes representing allele facial shape variation (95% CIs from  
647 Fig. 1L) defined by *Efnb1*<sup>wt</sup> (black ellipses), *Efnb1*<sup>ΔY</sup> (cyan ellipses) and *Efnb1*<sup>+Δ</sup> mutant (red ellipses). **(A)**  
648 *Ephb* null series specimens are colored by total number of null alleles. A subset of these specimens that are  
649 homozygous null for only one *Ephb* gene **(B)** or two *Ephb* genes **(C)** are plotted alongside EphB *wt* controls  
650 and “all null” specimens that are triple *Ephb1*<sup>-/-</sup>; *Ephb2*<sup>-/-</sup>; *Ephb3*<sup>-/-</sup> homozygous mutants. In **(B, C)**, unlisted  
651 *Ephb* genotypes include both +/+ and +/-, but not -/-, genotypes. Comparisons of specific genotypes illustrate  
652 the influence of homozygous and heterozygous genotypes across *Ephb1* **(D)**, *Ephb3* **(E)**, and *Ephb1*; *b3*  
653 homozygous null specimens **(F)**.

654

655 **Figure 7. EphB2 and EphB3 receptors mediate cell segregation in secondary palatal shelves.** Secondary  
656 palatal shelves of E13.5 embryos harboring compound loss of *Ephb1-3* receptors in combination with *Efnb1*<sup>+Δ</sup>  
657 heterozygosity with specific genotype combinations shown. Immunostaining for ephrin-B1 expression (white)

and DAPI (blue) is highlighted with a yellow dashed line at high magnification to demarcate cell segregated patches. **(A-F)** Compound loss of some EphB receptors does not reduce apparent ephrin-B1 driven cell segregation, with a relatively small number of large patches of cells observed. **(G, G')** Compound loss of EphB2 and EphB3 receptor resulted in smaller patches, with greater intermingling of ephrin-B1 positive and negative cells. **(H, H')** Loss of all known ephrin-B1 receptors (EphB1, EphB2, EphB3) also resulted in loss of cell segregation, but with the persistence of small patches of ephrin-B1 negative cells. *Scale bars, 100  $\mu$ m.*

## **Figure 8. Model of cell segregation and craniofacial dysmorphology in *Efnb1*<sup>+/-</sup> mutant embryos**

### **Supplemental Figures**

**Figure S1. Facial Shape Effects of Genotype (E11.5).** **(A-F)** Facial landmarks identified on representative *Efnb1*<sup>wt</sup> **(A-B)**, *Efnb1* <sup>$\Delta/Y$</sup>  **(C-D)**, and *Efnb1*<sup>+/ $\Delta$</sup>  **(E-F)** E11.5 specimen surfaces. **(G-H)** Common facial shape effects of *Efnb1* <sup>$\Delta/Y$</sup>  (cyan) and *Efnb1*<sup>+/ $\Delta$</sup>  (red) cyan genotypes on facial landmark position, compared to *Efnb1*<sup>wt</sup> (black) from the anterior **(G)** and lateral **(H)** views. The lengths of these shape difference vectors are magnified three times to allow for easy comparison. Thin black lines are placed for anatomical reference.

**Figure S2. Facial landmark definitions (E12.5-E14.5).** Facial landmarks used in morphometric analysis of E12.5-E14.5 samples, based on definitions found in **Table 9**, identified on lateral (left) and anterior (right) views of a representative E13.5 wildtype specimen.

**Figure S3. Craniofacial cell segregation first occurs in the post-migratory neural crest-derived mesenchyme, correlating with the onset of upregulation of ephrin-B1.** **(A, A')** Sox10-Cre drives recombination in the NCC-derived MXP mesenchyme and **(B, B')** frontonasal prominence (FNP) of *Sox10-Cre*<sup>Tg/0</sup>; *ROSA26*<sup>mTmG/+</sup> embryos at E10.5. **(C, C')** *Efnb1*<sup>+XGFP/lox</sup> control MXP and **(D, D')** FNP demonstrate a fine-grained mosaic pattern of XGFP expression at E10.5. Ephrin-B1 expression is not strong in the maxillae but has begun to be upregulated in the FNP at this stage. **(E, E')** Likewise, neural crest-specific *Efnb1*<sup>+XGFP/lox</sup>; *Sox10-Cre*<sup>Tg/0</sup> heterozygous embryos demonstrate a fine-grained mosaic pattern of XGFP expression in the

maxillary prominences at E10.5, indicating that segregation is not carried through from migratory NCCs. **(F, F')**  
The FNP of E10.5 *Efnb1*<sup>+XGFP/lox</sup>; *Sox10-Cre*<sup>Tg/0</sup> heterozygous embryos shows a small amount of segregation,  
visible as patches of GFP expression and non-expression, likely because ephrin-B1 has begun to be  
expressed in the FNP at this stage. **(G, G')** The maxillae of full *Efnb1*<sup>+Δ</sup> (recombination mediated by Actin-Cre)  
are also not segregated at E10.5, but segregation can be seen in the neural tissues of these embryos. **(H, H')**  
Segregation is visible in the developing LNP and in neural tissues of full ephrin-B1 heterozygotes.

691

**Figure S4. Palate-specific ephrin-B1 mosaicism results in cell segregation in the anterior palate**

**mesenchyme after E11.5. (A, A')** *Shox2*<sup>IresCre</sup> drives minimal recombination in the maxillary prominences of

*Shox2*<sup>IresCre/+</sup>; *ROSA26*<sup>mTmG/+</sup> embryos at E11.5. **(B, B')** Most membrane GFP-expressing cells also express

neurofilament (2H3) and are likely nerve cells of the maxillary trigeminal ganglion; only a few mesenchymal

cells have undergone recombination at this stage (white arrows). **(C, C')** By E12.5, *Shox2*<sup>IresCre/+</sup>;

*ROSA26*<sup>mTmG/+</sup> embryos express membrane GFP in the palatal shelf mesenchyme as well as **(D, D')** in the

nerve cells of the maxillary trigeminal ganglion. **(E, E')** At E11.5, the maxillae of *Efnb1*<sup>+XGFP/lox</sup> control and **(F,**

**F')** *Efnb1*<sup>+XGFP/lox</sup>; *Shox2*<sup>IresCre/+</sup> heterozygous embryos are indistinguishable; both genotypes demonstrate a

fine-grained mosaic pattern of XGFP expression in the maxillary prominences, indicating that no cell

segregation has taken place. **(G, G')** At E12.5, control palatal shelves show a fine-grained mosaic pattern of

XGFP expression. **(H, H')** Small patches of ephrin-B1/XGFP expressing and non-expressing cells are visible in

the palatal shelves of *Efnb1*<sup>+XGFP/lox</sup>; *Shox2*<sup>IresCre/+</sup> heterozygous embryos at E12.5, demonstrating that post-

migratory neural crest cells are also subject to segregation mediated by ephrin-B1 mosaicism. *Scale bars, 200*

*μm.*

706

**Figure S5. Ephrin-B1-mediated cell segregation in the brain does not affect development of craniofacial**

**structures. (A, A')** Recombination of the *ROSA26* locus in *Sox1*<sup>Cre/+</sup>; *ROSA26*<sup>mTmG/+</sup> embryos leads to

widespread membrane GFP expression throughout the brain at E13.5, but minimal membrane GFP expression

in **(B, B')** anterior palatal shelves or **(C, C')** anterior frontonasal prominence (FNP). **(D, D')** Ephrin-B1

mosaicism in early neural progenitor cells mediated by *Sox1*<sup>Cre</sup> does not drive segregation in neural crest-

711

712 derived craniofacial structures such as the anterior palatal shelves or (**E, E'**) FNP. Ephrin-B1 expression and  
713 craniofacial morphology appear normal in these embryos, indicating that neural progenitor cell segregation is  
714 an independent process. *Scale bars, 200  $\mu$ m.*

715  
716 **Figure S6. EphB2 and EphB3 receptors mediate cell segregation in FNP.** Frontonasal processes of E13.5  
717 embryos harboring compound loss of *Ephb1-3* receptor genes in combination with *Efnb1*<sup>+/-</sup> heterozygosity with  
718 specific genotype combinations shown. Immunostaining for ephrin-B1 expression (white) and DAPI (blue) is  
719 highlighted with a yellow dashed line at high magnification to demarcate cell segregated patches. (**A-F**)  
720 Compound loss of some EphB receptors does not reduce apparent ephrin-B1-driven cell segregation, with a  
721 relatively small number of large patches of cells observed. (**G, G'**) Compound loss of EphB2 and EphB3  
722 receptor resulted in smaller patches, with greater intermingling of ephrin-B1 positive and negative cells. (**H, H'**)  
723 Loss of all known ephrin-B1 receptors (EphB1, EphB2, EphB3) also resulted in loss of cell segregation, but  
724 with the persistence of small patches of ephrin-B1 negative cells. *Scale bars, 100  $\mu$ m.*

725  
726 **Figure S7. EphB receptor combinations mediating cell segregation in the brain.** The telencephalon  
727 region of the brain of E13.5 embryos harboring compound loss of *Ephb1-3* receptor genes in combination with  
728 *Efnb1*<sup>+/-</sup> heterozygosity with specific genotype combinations shown. Immunostaining for ephrin-B1 expression  
729 (white) and DAPI (blue) is highlighted with a yellow dashed line at high magnification to demarcate cell  
730 segregated patches. (**A-D**) Cell segregation was robust, but variable in its pattern with haploinsufficiency for  
731 various EphB receptors. (**E, E'**) Compound loss of EphB1 and EphB2 consistently resulted in a dramatic  
732 reduction in cell segregation, whereas (**F, F'**) compound loss of EphB1 and EphB3 exhibited no apparent  
733 reduction in cell segregation and (**G, G'**) compound loss of EphB2 and EphB3 was intermediate. (**H, H'**)  
734 Complete loss of all three EphB receptors resulted in a dramatic reduction in cell segregation that was similar  
735 to compound loss of EphB1 and EphB2. *Scale bars, 100  $\mu$ m.*

## 736 **Tables**

### 737 **Table 1. Significant influences on facial shape at E11.5 (Procrustes ANOVA)**

|                             | Df | SS    | MS    | Rsq <sup>c</sup> | F      | Z     | Pr(>F) |
|-----------------------------|----|-------|-------|------------------|--------|-------|--------|
| <b>Size<sup>a</sup></b>     | 1  | 0.141 | 0.141 | 0.229            | 24.719 | 6.274 | 0.001* |
| <b>Genotype<sup>b</sup></b> | 2  | 0.069 | 0.034 | 0.111            | 6.005  | 5.970 | 0.001* |
| <b>Residuals</b>            | 71 | 0.406 | 0.006 |                  |        |       |        |
| <b>Total</b>                | 74 | 0.615 |       |                  |        |       |        |

<sup>a</sup>Estimate of the influence of overall size (estimated as centroid size) on facial shape.

<sup>b</sup>Estimate of the influence of genotype (as a factor) on facial shape.

<sup>c</sup>Rsq provides an estimate of how much facial shape variance a given covariate explains.

\* indicates a significant effect on facial shape, as calculated using a permutation test.

**Table 2. Significant influences on facial shape from E12.5-E14.5 (Procrustes ANOVA)**

|                                 | Df  | SS    | MS    | Rsq <sup>e</sup> | F        | Z      | Pr(>F) |
|---------------------------------|-----|-------|-------|------------------|----------|--------|--------|
| <b>Size<sup>a</sup></b>         | 1   | 1.706 | 1.706 | 0.772            | 1083.475 | 7.158  | 0.001* |
| <b>Genotype<sup>b</sup></b>     | 2   | 0.145 | 0.072 | 0.066            | 46.005   | 13.728 | 0.001* |
| <b>Age<sup>c</sup></b>          | 1   | 0.011 | 0.011 | 0.005            | 7.287    | 9.243  | 0.001* |
| <b>Genotype:Age<sup>d</sup></b> | 2   | 0.016 | 0.008 | 0.007            | 5.207    | 10.914 | 0.001* |
| <b>Residuals</b>                | 210 | 0.331 | 0.002 |                  |          |        |        |
| <b>Total</b>                    | 216 | 2.210 |       |                  |          |        |        |

<sup>a</sup>Estimate of the influence of overall size (estimated as centroid size) on facial shape.

<sup>b</sup>Estimate of the influence of genotype (as a factor) on facial shape.

<sup>c</sup>Estimate of the influence of age (as continuous) on facial shape across E12.5-E14.5 specimens.

<sup>d</sup>Genotype:Age is the interaction effect of genotype and age.

<sup>e</sup>Rsq provides an estimate of how much facial shape variance a given covariate explains.

\* indicates a significant effect on facial shape, as calculated using a permutation test.

**Table 3. Age-specific comparisons of the Procrustes distances between the mean shape of affected and control genotypes, after accounting for allometry**

|                          | wildtype (95% CI)      | <i>Efnb1</i> genotype |                    |
|--------------------------|------------------------|-----------------------|--------------------|
|                          |                        | $\Delta/Y^a$          | $+/\Delta^a$       |
| <b>E11.5<sup>^</sup></b> | 0.07-0.18 <sup>^</sup> | 0.22* <sup>^</sup>    | 0.32* <sup>^</sup> |
| <b>E12.5</b>             | 0.04-0.09              | 0.15*                 | 0.23*              |
| <b>E13.5</b>             | 0.03-0.06              | 0.19*                 | 0.28*              |
| <b>E14.5</b>             | 0.03-0.06              | 0.18*                 | 0.29*              |

<sup>a</sup> Higher values represent a greater difference in facial shape, a proxy for severity of dysmorphology.

\* indicates a significantly different facial shape than control, based on the 95% control confidence intervals produced by bootstrapping the control sample.

<sup>^</sup> indicates that E11.5 Procrustes distance values cannot be directly compared to E12.5-E14.5 values, because they are based on a different landmark set and separate Procrustes superimposition. However, the pattern of the ordering of Procrustes distance values within ages can be compared and show similar patterns of significance.



**Table 4. Significant influence of facial size but not *Efnb1*; *Sox1-Cre* genotype on facial shape at E14.5 (Procrustes ANOVA)**

|                             | Df | SS    | MS    | Rsq <sup>c</sup> | F     | Z      | Pr(>F) |
|-----------------------------|----|-------|-------|------------------|-------|--------|--------|
| <b>Size<sup>a</sup></b>     | 1  | 0.009 | 0.009 | 0.274            | 8.159 | 3.895  | 0.001* |
| <b>Genotype<sup>b</sup></b> | 1  | 0.001 | 0.001 | 0.021            | 0.617 | -0.039 | 0.464  |
| <b>Residuals</b>            | 21 | 0.023 | 0.001 |                  |       |        |        |
| <b>Total</b>                | 23 | 0.033 |       |                  |       |        |        |

<sup>a</sup>Estimate of the influence of overall size (estimated as centroid size) on facial shape.

<sup>b</sup>Estimate of the influence of genotype (as a factor) on facial shape.

<sup>c</sup>Rsq provides an estimate of how much facial shape variance a given covariate explains.

\* indicates a significant effect on facial shape, as calculated using a permutation test.

**Table 5. Significant influences of facial size and *Efnb1*; *Sox10-Cre* genotype on facial shape at E14.5 (Procrustes ANOVA)**

|                             | Df | SS    | MS    | Rsq <sup>c</sup> | F      | Z     | Pr(>F) |
|-----------------------------|----|-------|-------|------------------|--------|-------|--------|
| <b>Size<sup>a</sup></b>     | 1  | 0.011 | 0.011 | 0.163            | 12.170 | 4.585 | 0.001* |
| <b>Genotype<sup>b</sup></b> | 3  | 0.024 | 0.008 | 0.367            | 9.097  | 6.514 | 0.001* |
| <b>Residuals</b>            | 35 | 0.031 | 0.001 |                  |        |       |        |
| <b>Total</b>                | 39 | 0.066 |       |                  |        |       |        |

<sup>a</sup>Estimate of the influence of overall size (estimated as centroid size) on facial shape.

<sup>b</sup>Estimate of the influence of genotype (as a factor) on facial shape.

<sup>c</sup>Rsq provides an estimate of how much facial shape variance a given covariate explains.

\* indicates a significant effect on facial shape, as calculated using a permutation test.

**Table 6. Procrustes distances<sup>a</sup> of E14.5 facial shapes of *Efnb1* mutant genotypes using tissue-specific Cre alleles**

|                           | Control Male              | Control Female | Hemizygous | Heterozygous |
|---------------------------|---------------------------|----------------|------------|--------------|
| <b>Actin-Cre</b>          | <b>0.03-0.08 (95% CI)</b> |                | 0.14*      | 0.28*        |
| <b>Sox10-Cre</b>          | 0.07                      | 0.07           | 0.16*      | 0.24*        |
| <b>Sox1<sup>Cre</sup></b> | NA                        | 0.10*          | NA         | 0.09*        |

<sup>a</sup> Higher values represent a greater difference in facial shape, a proxy for severity of dysmorphology.

\* indicates a significantly different facial shape than E14.5 *Efnb1*<sup>wt</sup> controls used for comparison to *Efnb1*<sup>+Δ</sup> and *Efnb1*<sup>Δ/Y</sup>; based on the 95% control confidence intervals produced by bootstrapping.

^ Although both Sox1<sup>Cre</sup> controls and heterozygote facial shapes are significantly different than β-actin-cre controls, they are not significantly different from each other.

**Table 7. Significant influences of facial size and *Ephb* receptor genotype on facial shape at E14.5**

|                          | Df | SS    | MS    | Rsq <sup>c</sup> | F      | Z     | Pr(>F) |
|--------------------------|----|-------|-------|------------------|--------|-------|--------|
| <b>Size<sup>a</sup></b>  | 1  | 0.049 | 0.049 | 0.247            | 49.583 | 7.546 | 0.001* |
| <b>EphB1<sup>b</sup></b> | 1  | 0.002 | 0.002 | 0.011            | 2.247  | 2.881 | 0.005* |
| <b>EphB2<sup>b</sup></b> | 1  | 0.012 | 0.012 | 0.060            | 12.078 | 6.915 | 0.001* |
| <b>EphB3<sup>b</sup></b> | 1  | 0.019 | 0.019 | 0.098            | 19.589 | 8.411 | 0.001* |

|                  |     |       |       |
|------------------|-----|-------|-------|
| <b>Residuals</b> | 117 | 0.114 | 0.001 |
| <b>Total</b>     | 121 | 0.196 |       |

<sup>a</sup>Estimate of the influence of overall size (estimated as centroid size) on facial shape.

<sup>b</sup>Estimate of the additive influence of a specific EphB genotype (as a factor) on facial shape.

<sup>c</sup>Rsq provides an estimate of how much facial shape variance a given covariate explains.

\*indicates a significant effect on facial shape, as calculated using a permutation test.

**Table 8. Antibody information for immunofluorescence (IF)**

| <b>Primary Antibodies</b>          | <b>Source</b> | <b>Catalog #</b> | <b>Dilution</b> |
|------------------------------------|---------------|------------------|-----------------|
| Ephrin-B1                          | R&D Systems   | AF473            | 0.2 µg/mL       |
| EphB2                              | R&D Systems   | AF467            | 1:10            |
| EphB3                              | R&D Systems   | AF432            | 1:20            |
| GFP                                | Abcam         | ab13970          | 1:500           |
| 2H3 (neurofilament)                | DSHB          | 2H3              | 2 µg/mL         |
| <b>Secondary Antibodies</b>        | <b>Source</b> | <b>Catalog #</b> | <b>Dilution</b> |
| Donkey anti-rabbit Alexa Fluor 488 | Jackson IR    | 711-165-152      | 1:400           |
| Donkey anti-mouse Cy2              | Jackson IR    | 715-225-150      | 1:400           |
| Donkey anti-chicken Cy2            | Jackson IR    | 703-225-155      | 1:350           |
| Donkey anti-goat Cy3               | Jackson IR    | 705-165-003      | 1:300           |

**Table 9. Landmarks for E12.5-E14.5 morphometrics analysis**

| <b>Landmark Number</b> | <b>Landmark Definition</b>                                                                                                                                                      |
|------------------------|---------------------------------------------------------------------------------------------------------------------------------------------------------------------------------|
| 1                      | Most rostral midline point on the developing rostrum                                                                                                                            |
| 2                      | The ventral most midline point along the developing lip                                                                                                                         |
| 3 (15)                 | Dorso-caudal corner of the whisker field, taken on the skin right next to the plateau of the whisker field, rather than on the field itself                                     |
| 4 (16)                 | Ventro-rostral tip of the plateau on the ventro-rostral member of the supra-orbital vibrissae pair that is found dorsal to the eye                                              |
| 5 (17)                 | Rostral apex of the forming Medial Canthus of the eye                                                                                                                           |
| 6 (18)                 | Caudal apex of the forming Lateral Canthus of the eye                                                                                                                           |
| 7 (19)                 | Center of the infraorbital vibrissa found ventral to the eye                                                                                                                    |
| 8 (20)                 | Point at the rostral base of the dorso-caudal portion of the developing pina of the ear                                                                                         |
| 9 (21)                 | Point at the rostral base of the ventro-rostral portion of the developing pina of the ear                                                                                       |
| 10 (22)                | Point at the edge of the whisker margin between the second and third whisker rows, counting from the top. This point is frequently next to the second large mystacial vibrissa. |
| 11 (23)                | Ventro-caudal corner of the whisker field, taken on the skin right next to the plateau of the whisker field, rather than on the field itself                                    |
| 12 (24)                | Medial point on edge of nasal aperture at the point of inflection between the lower vertical portion and the upper diagonal portion of the nasal aperture                       |
| 13 (25)                | Point at dorso-lateral most extent of nasal aperture                                                                                                                            |
| 14 (26)                | Caudo-lateral most point on the upper lip, where it meets the lower lip                                                                                                         |



## 809 References

- 810 1. Shaw W. Global strategies to reduce the health care burden of craniofacial anomalies: report of WHO  
811 meetings on international collaborative research on craniofacial anomalies. *Cleft Palate-Craniofacial J Off*  
812 *Publ Am Cleft Palate-Craniofacial Assoc.* 2004;41: 238–243. doi:10.1597/03-214.1
- 813 2. Twigg SRF, Wilkie AOM. New insights into craniofacial malformations. *Hum Mol Genet.* 2015;24: R50-59.  
814 doi:10.1093/hmg/ddv228
- 815 3. Cohen MM Jr. Craniofrontonasal dysplasia. *Birth Defects Orig Artic Ser.* 1979;15: 85–9.
- 816 4. Twigg SRF, Kan R, Babbs C, Bochukova EG, Robertson SP, Wall SA, et al. Mutations of ephrin-B1  
817 (EFNB1), a marker of tissue boundary formation, cause craniofrontonasal syndrome. *Proc Natl Acad Sci*  
818 *U S A.* 2004;101: 8652–8657. doi:10.1073/pnas.0402819101
- 819 5. Wieland I, Jakubiczka S, Muschke P, Cohen M, Thiele H, Gerlach KL, et al. Mutations of the ephrin-B1  
820 gene cause craniofrontonasal syndrome. *Am J Hum Genet.* 2004;74: 1209–1215. doi:10.1086/421532
- 821 6. Wieacker P, Wieland I. Clinical and genetic aspects of craniofrontonasal syndrome: towards resolving a  
822 genetic paradox. *Mol Genet Metab.* 2005;86: 110–116. doi:10.1016/j.ymgme.2005.07.017
- 823 7. van den Elzen MEP, Twigg SRF, Goos J a. C, Hoogeboom AJM, van den Ouweland AMW, Wilkie AOM,  
824 et al. Phenotypes of craniofrontonasal syndrome in patients with a pathogenic mutation in EFNB1. *Eur J*  
825 *Hum Genet EJHG.* 2014;22: 995–1001. doi:10.1038/ejhg.2013.273
- 826 8. Davy A, Aubin J, Soriano P. Ephrin-B1 forward and reverse signaling are required during mouse  
827 development. *Genes Dev.* 2004;18: 572–83. doi:10.1101/gad.1171704
- 828 9. Davy A, Bush JO, Soriano P. Inhibition of gap junction communication at ectopic Eph/ephrin boundaries  
829 underlies craniofrontonasal syndrome. *PLoS Biol.* 2006;4: e315. doi:10.1371/journal.pbio.0040315
- 830 10. Nguyen TM, Arthur A, Paton S, Hemming S, Panagopoulos R, Codrington J, et al. Loss of ephrinB1 in  
831 osteogenic progenitor cells impedes endochondral ossification and compromises bone strength integrity  
832 during skeletal development. *Bone.* 2016;93: 12–21. doi:10.1016/j.bone.2016.09.009
- 833 11. Marcucio RS, Young NM, Hu D, Hallgrímsson B. Mechanisms that underlie co-variation of the brain and  
834 face. *Genes N Y N* 2000. 2011;49: 177–189. doi:10.1002/dvg.20710
- 835 12. Marcucio R, Hallgrímsson B, Young NM. Facial Morphogenesis: Physical and Molecular Interactions  
836 Between the Brain and the Face. *Curr Top Dev Biol.* 2015;115: 299–320.  
837 doi:10.1016/bs.ctdb.2015.09.001
- 838 13. Boughner JC, Wat S, Diewert VM, Young NM, Browder LW, Hallgrímsson B. Short-faced mice and  
839 developmental interactions between the brain and the face. *J Anat.* 2008;213: 646–62.  
840 doi:10.1111/j.1469-7580.2008.00999.x
- 841 14. Weinberg SM, Andreasen NC, Nopoulos P. Three-dimensional morphometric analysis of brain shape in  
842 nonsyndromic orofacial clefting. *J Anat.* 2009;214: 926–936. doi:10.1111/j.1469-7580.2009.01084.x
- 843 15. Parsons TE, Schmidt EJ, Boughner JC, Jamniczky HA, Marcucio RS, Hallgrímsson B. Epigenetic  
844 integration of the developing brain and face. *Dev Dyn Off Publ Am Assoc Anat.* 2011;240: 2233–2244.  
845 doi:10.1002/dvdy.22729

- 846 16. Young NM, Wat S, Diewert VM, Browder LW, Hallgrímsson B. Comparative morphometrics of embryonic  
847 facial morphogenesis: implications for cleft-lip etiology. *Anat Rec Hoboken NJ* 2007. 2007;290: 123–139.  
848 doi:10.1002/ar.20415
- 849 17. Hu D, Young NM, Xu Q, Jamniczky H, Green RM, Mio W, et al. Signals from the brain induce variation in  
850 avian facial shape. *Dev Dyn*. 2015;244: 1133–1143. doi:10.1002/dvdy.24284
- 851 18. Marcucio RS, Cordero DR, Hu D, Helms JA. Molecular interactions coordinating the development of the  
852 forebrain and face. *Dev Biol*. 2005;284: 48–61. doi:10.1016/j.ydbio.2005.04.030
- 853 19. Schneider RA, Hu D, Rubenstein JLR, Maden M, Helms JA. Local retinoid signaling coordinates forebrain  
854 and facial morphogenesis by maintaining FGF8 and SHH. *Development*. 2001;128: 2755–2767.
- 855 20. Young NM, Chong HJ, Hu D, Hallgrímsson B, Marcucio RS. Quantitative analyses link modulation of  
856 sonic hedgehog signaling to continuous variation in facial growth and shape. *Dev Camb Engl*. 2010;137:  
857 3405–3409. doi:10.1242/dev.052340
- 858 21. Hukki J, Saarinen P, Kangasniemi M. Single suture craniosynostosis: diagnosis and imaging. *Craniofacial*  
859 *Sutures*. Karger Publishers; 2008. pp. 79–90.
- 860 22. Heuzé Y, Martínez-Abadías N, Stella JM, Senders CW, Boyadjiev SA, Lo L-J, et al. Unilateral and  
861 bilateral expression of a quantitative trait: asymmetry and symmetry in coronal craniosynostosis. *J Exp*  
862 *Zool B Mol Dev Evol*. 2012;318: 109–122.
- 863 23. Bastir M, Rosas A. Correlated variation between the lateral basicranium and the face: a geometric  
864 morphometric study in different human groups. *Arch Oral Biol*. 2006;51: 814–824.
- 865 24. Parsons TE, Downey CM, Jirik FR, Hallgrímsson B, Jamniczky HA. Mind the Gap: Genetic Manipulation  
866 of Basicranial Growth within Synchronroses Modulates Calvarial and Facial Shape in Mice through  
867 Epigenetic Interactions. *PLoS ONE*. 2015;10: 1–22. doi:10.1371/journal.pone.0118355
- 868 25. Martínez-Abadías N, Percival C, Aldridge K, Hill C, Ryan T, Sirivunnabood S, et al. Beyond the closed  
869 suture in Apert mouse models: evidence of primary effects of FGFR2 signaling on facial shape at P0. *Dev*  
870 *Dyn*. 2010;239: 3058–3071.
- 871 26. Hill CA, Martínez-Abadías N, Motch SM, Austin JR, Wang Y, Jabs EW, et al. Postnatal brain and skull  
872 growth in an Apert syndrome mouse model. *Am J Med Genet A*. 2013;161: 745–757.
- 873 27. Li X, Young NM, Tropp S, Hu D, Xu Y, Hallgrímsson B, et al. Quantification of shape and cell polarity  
874 reveals a novel mechanism underlying malformations resulting from related FGF mutations during facial  
875 morphogenesis. *Hum Mol Genet*. 2013;22: 5160–5172. doi:10.1093/hmg/ddt369
- 876 28. Battle E, Wilkinson DG. Molecular Mechanisms of Cell Segregation and Boundary Formation in  
877 Development and Tumorigenesis. *Cold Spring Harb Perspect Biol*. 2012;4: a008227–a008227.  
878 doi:10.1101/cshperspect.a008227
- 879 29. Fagotto F, Winklbauer R, Rohani N. Ephrin-Eph signaling in embryonic tissue separation. *Cell Adhes*  
880 *Migr*. 2014;8: 308–326. doi:10.4161/19336918.2014.970028
- 881 30. Kania A, Klein R. Mechanisms of ephrin-Eph signalling in development, physiology and disease. *Nat Rev*  
882 *Mol Cell Biol*. 2016;advance online publication. doi:10.1038/nrm.2015.16
- 883 31. Klein R, Kania A. Ephrin signalling in the developing nervous system. *Curr Opin Neurobiol*. 2014;27: 16–  
884 24. doi:10.1016/j.conb.2014.02.006

- 885 32. Kullander K, Klein R. Mechanisms and functions of Eph and ephrin signalling. *Nat Rev Mol Cell Biol.* 2002;3: 475–486. doi:10.1038/nrm856  
886
- 887 33. Niethamer TK, Bush JO. Getting direction(s): The Eph/ephrin signaling system in cell positioning. *Dev Biol.* 2019;447: 42–57. doi:10.1016/j.ydbio.2018.01.012  
888
- 889 34. Pasquale EB. Eph receptor signalling casts a wide net on cell behaviour. *Nat Rev Mol Cell Biol.* 2005;6:  
890 462–475. doi:10.1038/nrm1662
- 891 35. Pasquale EB. Eph-ephrin bidirectional signaling in physiology and disease. *Cell.* 2008;133: 38–52.  
892 doi:10.1016/j.cell.2008.03.011
- 893 36. Wilkinson DG. Multiple roles of EPH receptors and ephrins in neural development. *Nat Rev Neurosci.*  
894 2001;2: 155–164. doi:10.1038/35058515
- 895 37. Wieland I, Makarov R, Reardon W, Tinschert S, Goldenberg A, Thierry P, et al. Dissecting the molecular  
896 mechanisms in craniofrontonasal syndrome: differential mRNA expression of mutant EFNB1 and the  
897 cellular mosaic. *Eur J Hum Genet EJHG.* 2008;16: 184–191. doi:10.1038/sj.ejhg.5201968
- 898 38. Twigg SRF, Matsumoto K, Kidd AMJ, Goriely A, Taylor IB, Fisher RB, et al. The origin of EFNB1  
899 mutations in craniofrontonasal syndrome: frequent somatic mosaicism and explanation of the paucity of  
900 carrier males. *Am J Hum Genet.* 2006;78: 999–1010. doi:10.1086/504440
- 901 39. Twigg SRF, Babbs C, van den Elzen MEP, Goriely A, Taylor S, McGowan SJ, et al. Cellular interference  
902 in craniofrontonasal syndrome: males mosaic for mutations in the X-linked EFNB1 gene are more  
903 severely affected than true hemizygotes. *Hum Mol Genet.* 2013;22: 1654–1662. doi:10.1093/hmg/ddt015
- 904 40. Babbs C, Stewart HS, Williams LJ, Connell L, Goriely A, Twigg SRF, et al. Duplication of the EFNB1 gene  
905 in familial hypertelorism: imbalance in ephrin-B1 expression and abnormal phenotypes in humans and  
906 mice. *Hum Mutat.* 2011;32: 930–938. doi:10.1002/humu.21521
- 907 41. Bush JO, Soriano P. Ephrin-B1 forward signaling regulates craniofacial morphogenesis by controlling cell  
908 proliferation across Eph-ephrin boundaries. *Genes Dev.* 2010;24: 2068–2080. doi:10.1101/gad.1963210
- 909 42. Compagni A, Logan M, Klein R, Adams RH. Control of skeletal patterning by ephrinB1-EphB interactions.  
910 *Dev Cell.* 2003;5: 217–30.
- 911 43. Niethamer TK, Larson AR, O'Neill AK, Bershteyn M, Hsiao EC, Klein OD, et al. EPHRIN-B1 Mosaicism  
912 Drives Cell Segregation in Craniofrontonasal Syndrome hiPSC-Derived Neuroepithelial Cells. *Stem Cell*  
913 *Rep.* 2017;8: 529–537. doi:10.1016/j.stemcr.2017.01.017
- 914 44. O'Neill AK, Kindberg AA, Niethamer TK, Larson AR, Ho H-YH, Greenberg ME, et al. Unidirectional  
915 Eph/ephrin signaling creates a cortical actomyosin differential to drive cell segregation. *J Cell Biol.*  
916 2016;215: 217–229. doi:10.1083/jcb.201604097
- 917 45. Percival CJ, Green R, Marcucio R, Hallgrímsson B. Surface landmark quantification of embryonic mouse  
918 craniofacial morphogenesis. *BMC Dev Biol.* 2014;14: 31. doi:10.1186/1471-213X-14-31
- 919 46. Hadjantonakis AK, Gertsenstein M, Ikawa M, Okabe M, Nagy A. Non-invasive sexing of preimplantation  
920 stage mammalian embryos. *Nat Genet.* 1998;19: 220–2. doi:10.1038/893
- 921 47. Hadjantonakis AK, Cox LL, Tam PP, Nagy A. An X-linked GFP transgene reveals unexpected paternal X-  
922 chromosome activity in trophoblastic giant cells of the mouse placenta. *Genesis.* 2001;29: 133–40.



- 923 48. Inoue Y, Sakamoto Y, Sugimoto M, Inagaki H, Boda H, Miyata M, et al. A Family with Craniofrontonasal  
924 Syndrome: The First Report of Familial Cases of Craniofrontonasal Syndrome with Bilateral Cleft Lip and  
925 Palate. *Cleft Palate-Craniofacial J Off Publ Am Cleft Palate-Craniofacial Assoc.* 2018;55: 1026–1029.  
926 doi:10.1597/15-347
- 927 49. Shotelersuk V, Siriwan P, Ausavarat S. A novel mutation in EFNB1, probably with a dominant negative  
928 effect, underlying craniofrontonasal syndrome. *Cleft Palate-Craniofacial J Off Publ Am Cleft Palate-  
929 Craniofacial Assoc.* 2006;43: 152–154. doi:10.1597/05-014.1
- 930 50. Dougherty KJ, Zagoraiou L, Satoh D, Rozani I, Doobar S, Arber S, et al. Locomotor Rhythm Generation  
931 Linked to the Output of Spinal Shox2 Excitatory Interneurons. *Neuron.* 2013;80: 920–933.  
932 doi:10.1016/j.neuron.2013.08.015
- 933 51. Yu L, Gu S, Alappat S, Song Y, Yan M, Zhang X, et al. Shox2-deficient mice exhibit a rare type of  
934 incomplete clefting of the secondary palate. *Dev Camb Engl.* 2005;132: 4397–4406.  
935 doi:10.1242/dev.02013
- 936 52. Arvanitis DN, Béhar A, Tryoen-Tóth P, Bush JO, Jungas T, Vitale N, et al. Ephrin B1 maintains apical  
937 adhesion of neural progenitors. *Development.* 2013;140: 2082–2092. doi:10.1242/dev.088203
- 938 53. Jones NC, Lynn ML, Gaudenz K, Sakai D, Aoto K, Rey JP, et al. Prevention of the neurocristopathy  
939 Treacher Collins syndrome through inhibition of p53 function. *Nat Med.* 2008;14: 125–33.  
940 doi:10.1038/nm1725
- 941 54. Sakai D, Dixon J, Achilleos A, Dixon M, Trainor PA. Prevention of Treacher Collins syndrome craniofacial  
942 anomalies in mouse models via maternal antioxidant supplementation. *Nat Commun.* 2016;7: 10328.  
943 doi:10.1038/ncomms10328
- 944 55. Takashima Y, Era T, Nakao K, Kondo S, Kasuga M, Smith AG, et al. Neuroepithelial cells supply an initial  
945 transient wave of MSC differentiation. *Cell.* 2007;129: 1377–1388. doi:10.1016/j.cell.2007.04.028
- 946 56. Blits-Huizinga CT, Nelersa CM, Malhotra A, Liebl DJ. Ephrins and their receptors: binding versus biology.  
947 *IUBMB Life.* 2004;56: 257–265. doi:10.1080/15216540412331270076
- 948 57. Dravis C, Henkemeyer M. Ephrin-B reverse signaling controls septation events at the embryonic midline  
949 through separate tyrosine phosphorylation-independent signaling avenues. *Dev Biol.* 2011;355: 138–151.  
950 doi:10.1016/j.ydbio.2011.04.020
- 951 58. Orioli D, Henkemeyer M, Lemke G, Klein R, Pawson T. Sek4 and Nuk receptors cooperate in guidance of  
952 commissural axons and in palate formation. *EMBO J.* 1996;15: 6035–6049.
- 953 59. Risley M, Garrod D, Henkemeyer M, McLean W. EphB2 and EphB3 forward signalling are required for  
954 palate development. *Mech Dev.* 2009;126: 230–239. doi:10.1016/j.mod.2008.10.009
- 955 60. Henkemeyer M, Orioli D, Henderson JT, Saxton TM, Roder J, Pawson T, et al. Nuk controls pathfinding of  
956 commissural axons in the mammalian central nervous system. *Cell.* 1996;86: 35–46.
- 957 61. Williams SE, Mann F, Erskine L, Sakurai T, Wei S, Rossi DJ, et al. Ephrin-B2 and EphB1 mediate retinal  
958 axon divergence at the optic chiasm. *Neuron.* 2003;39: 919–935.
- 959 62. Rollnick B, Day D, Tissot R, Kaye C. A pedigree possible evidence for the metabolic interference  
960 hypothesis. *Am J Hum Genet.* 1981;33: 823–826.
- 961 63. Bush JO, Soriano P. Eph/ephrin signaling: genetic, phosphoproteomic, and transcriptomic approaches.  
962 *Semin Cell Dev Biol.* 2012;23: 26–34. doi:10.1016/j.semcdb.2011.10.018



- 963 64. Davy A, Soriano P. Ephrin signaling in vivo: look both ways. *Dev Dyn Off Publ Am Assoc Anat.* 2005;232:  
964 1–10. doi:10.1002/dvdy.20200
- 965 65. Agrawal P, Wang M, Kim S, Lewis AE, Bush JO. Embryonic expression of EphA receptor genes in mice  
966 supports their candidacy for involvement in cleft lip and palate. *Dev Dyn Off Publ Am Assoc Anat.* 2014;  
967 doi:10.1002/dvdy.24170
- 968 66. North HA, Zhao X, Kolk SM, Clifford MA, Ziskind DM, Donoghue MJ. Promotion of proliferation in the  
969 developing cerebral cortex by EphA4 forward signaling. *Dev Camb Engl.* 2009;136: 2467–2476.  
970 doi:10.1242/dev.034405
- 971 67. Skare Ø, Gjessing HK, Gjerdevik M, Haaland ØA, Romanowska J, Lie RT, et al. A new approach to  
972 chromosome-wide analysis of X-linked markers identifies new associations in Asian and European case-  
973 parent triads of orofacial clefts. *PLOS ONE.* 2017;12: e0183772. doi:10.1371/journal.pone.0183772
- 974 68. Lewandoski M, Meyers EN, Martin GR. Analysis of Fgf8 gene function in vertebrate development. *Cold  
975 Spring Harb Symp Quant Biol.* 1997;62: 159–168.
- 976 69. Matsuoka T, Ahlberg PE, Kessar N, Iannarelli P, Dennehy U, Richardson WD, et al. Neural crest origins  
977 of the neck and shoulder. *Nature.* 2005;436: 347–355. doi:10.1038/nature03837
- 978 70. Muzumdar MD, Tasic B, Miyamichi K, Li L, Luo L. A global double-fluorescent Cre reporter mouse. *Genes  
979 N Y N 2000.* 2007;45: 593–605. doi:10.1002/dvg.20335
- 980 71. Adams DC, Otárola-Castillo E. geomorph: an r package for the collection and analysis of geometric  
981 morphometric shape data. *Methods Ecol Evol.* 2013;4: 393–399. doi:10.1111/2041-210X.12035

982

Figure 1

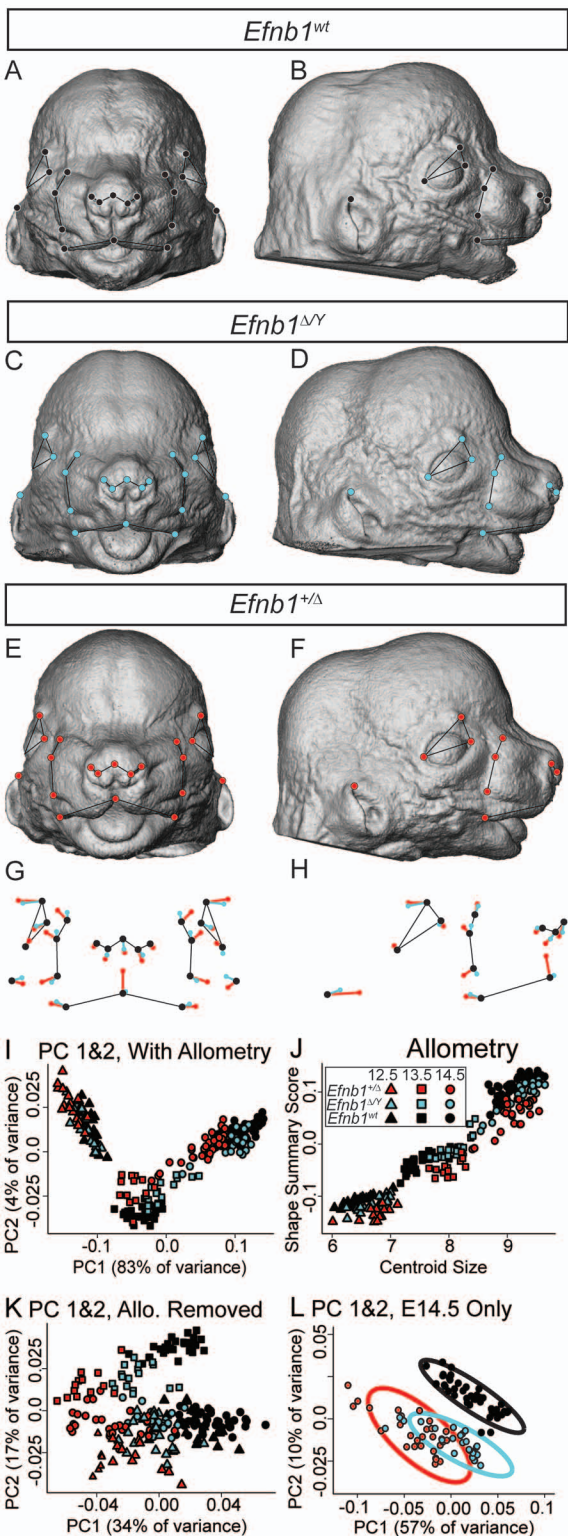

Figure 2

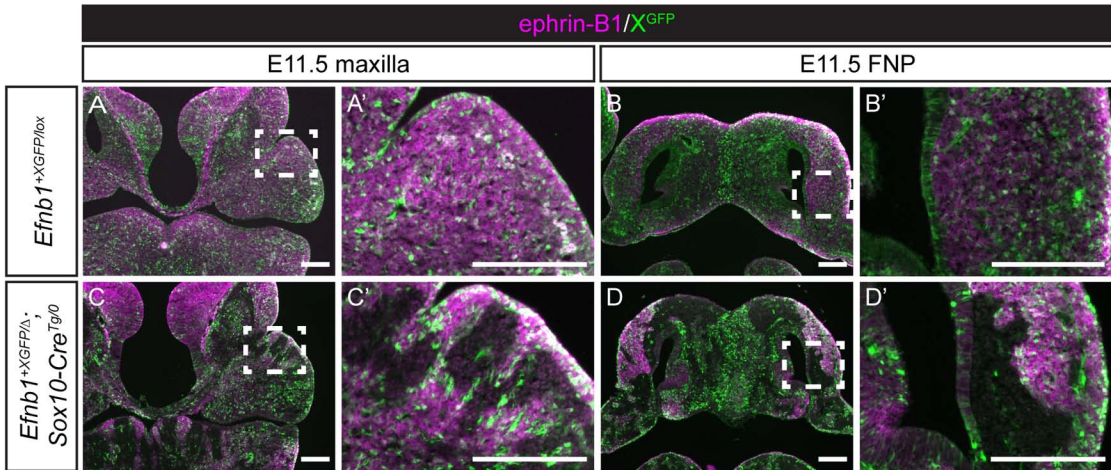



Figure 3

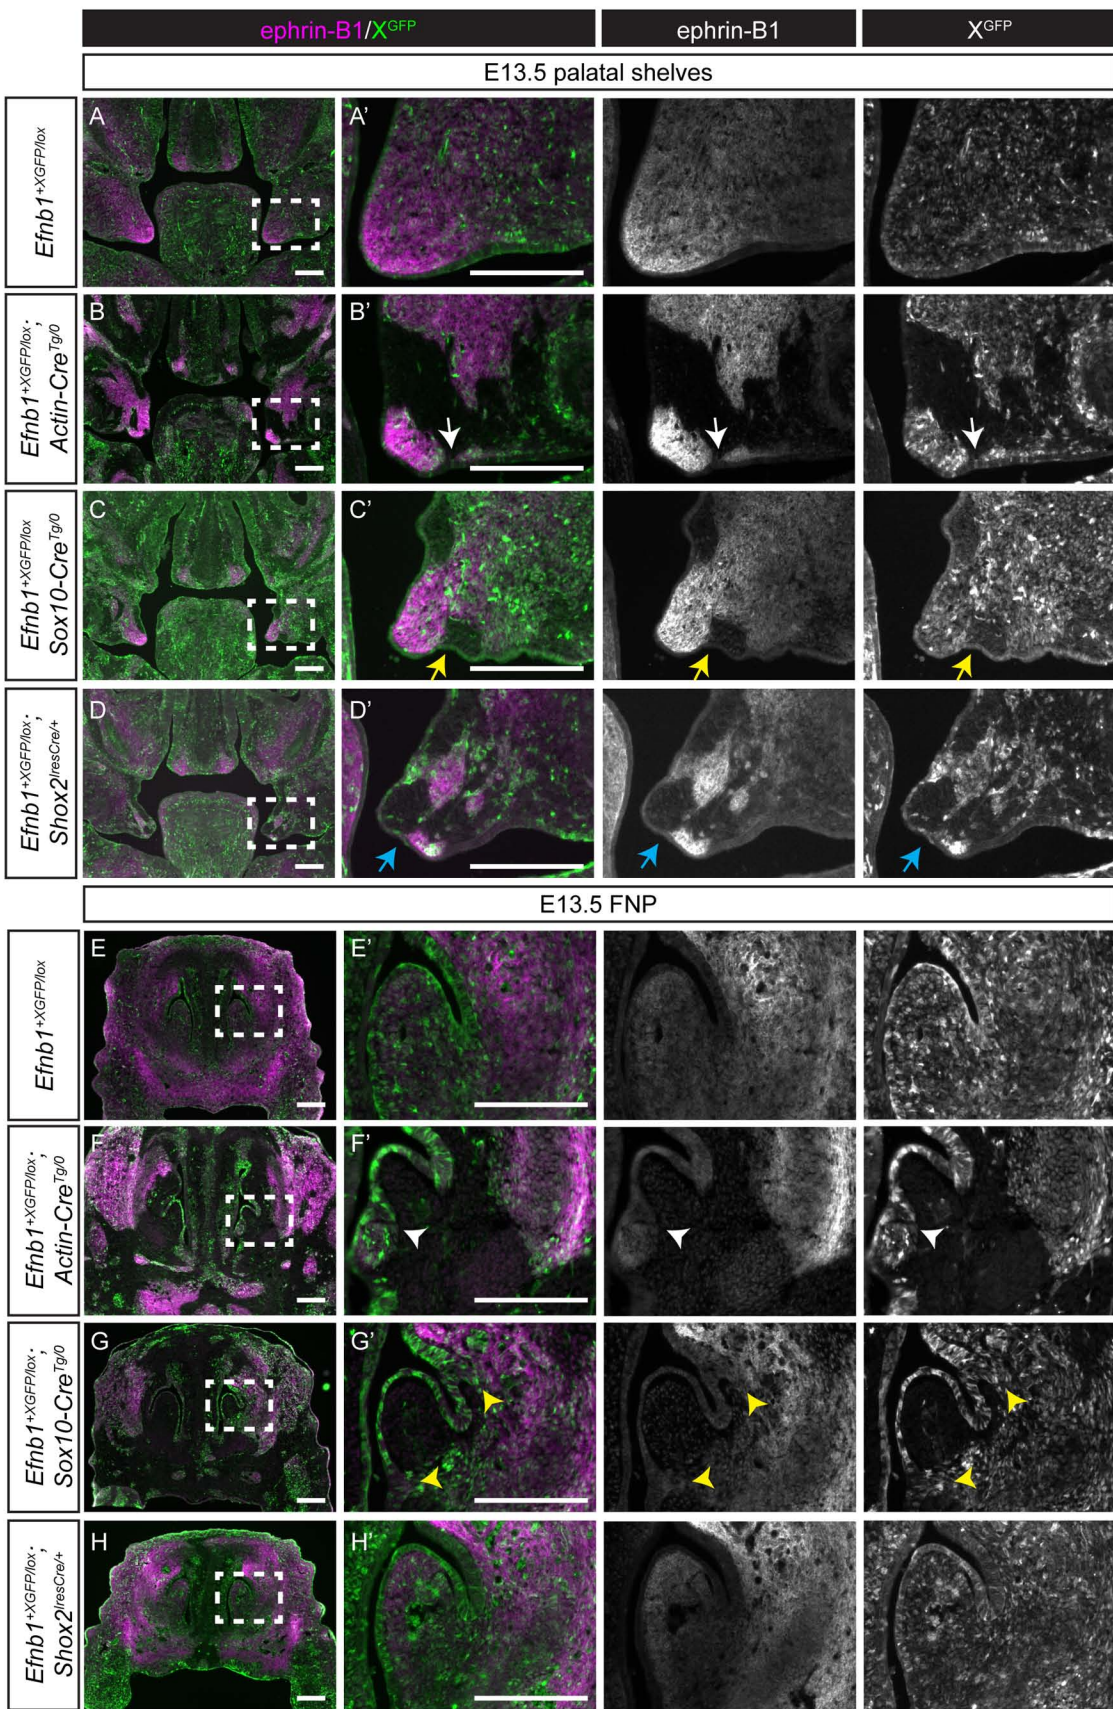

Figure 4

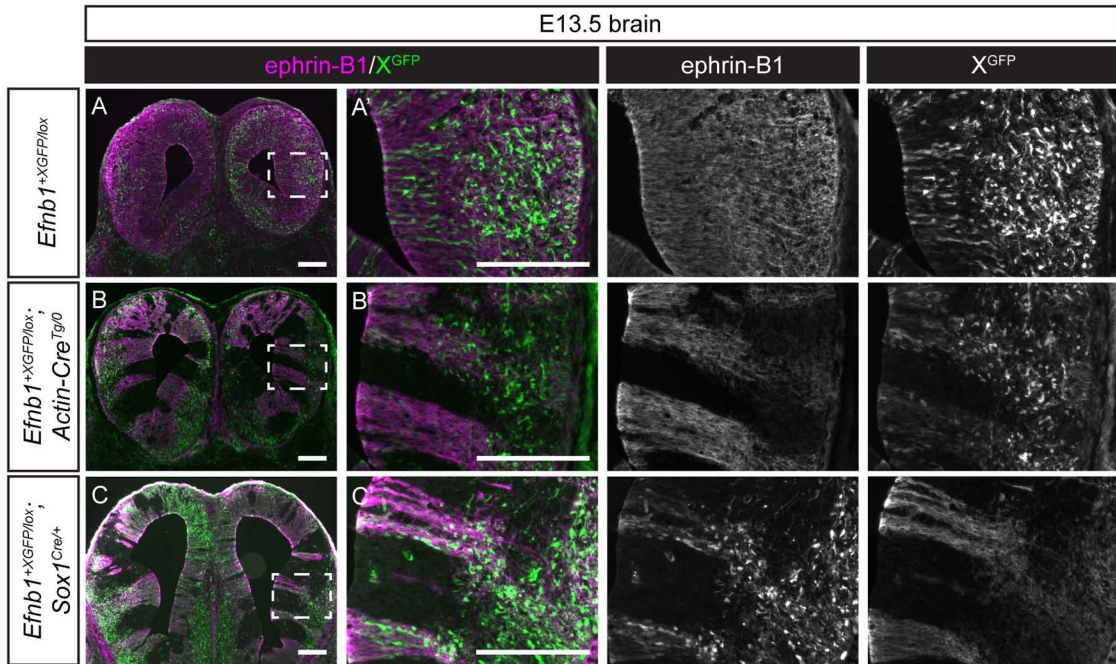

Figure 5

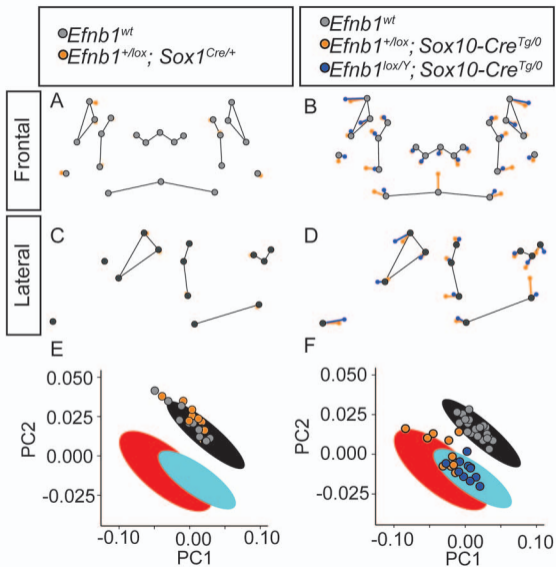



Figure 6

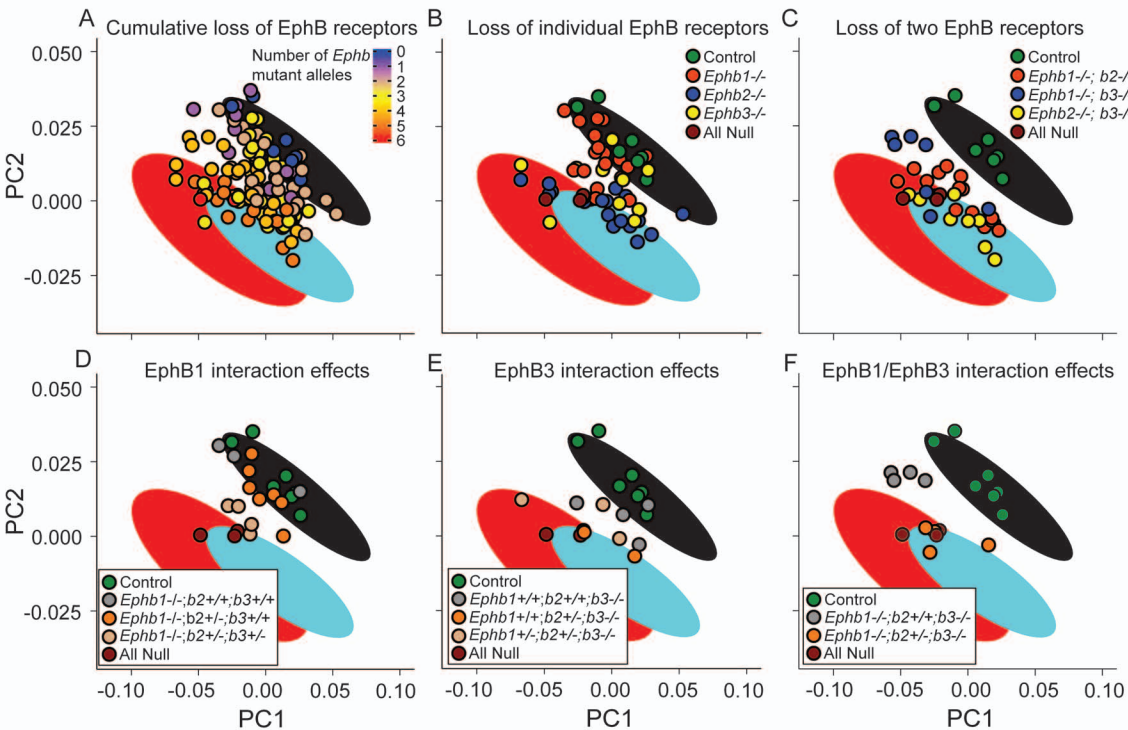



Figure 7

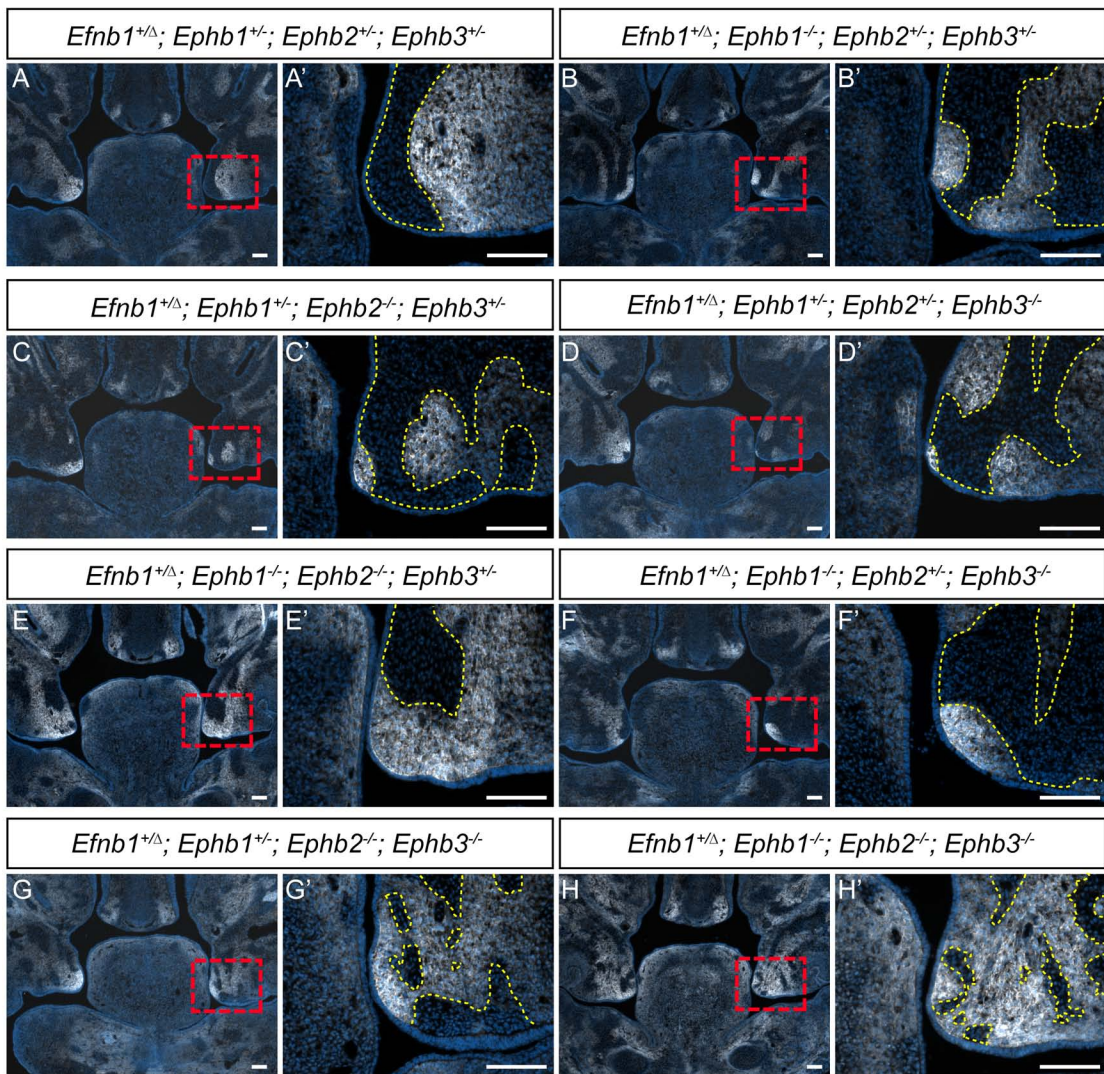

Figure 8

■ ephrin-B1 mutant cell  
■ ephrin-B1 expressing cell

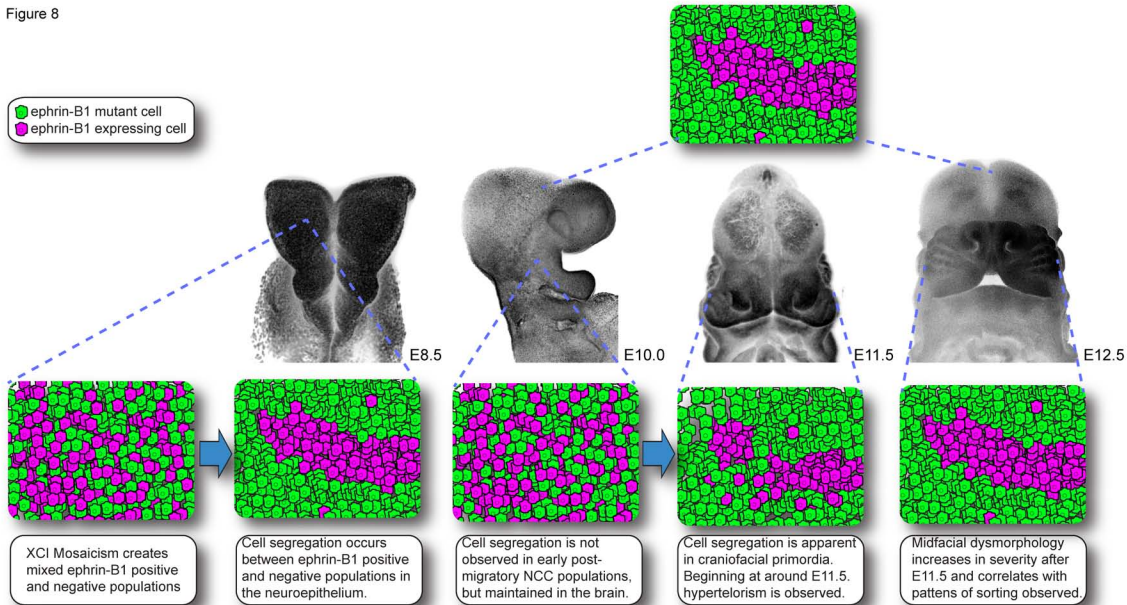

Figure S1

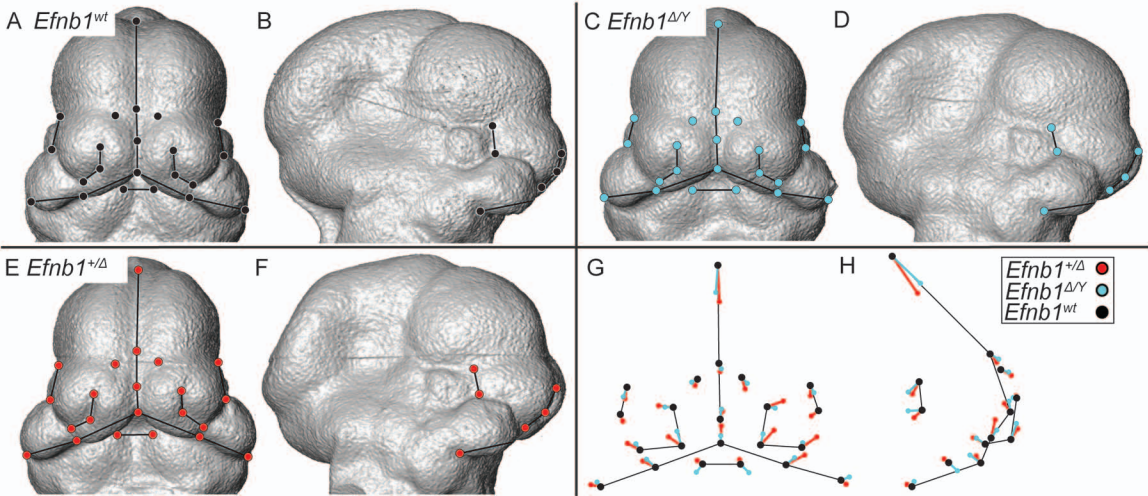

Figure S2

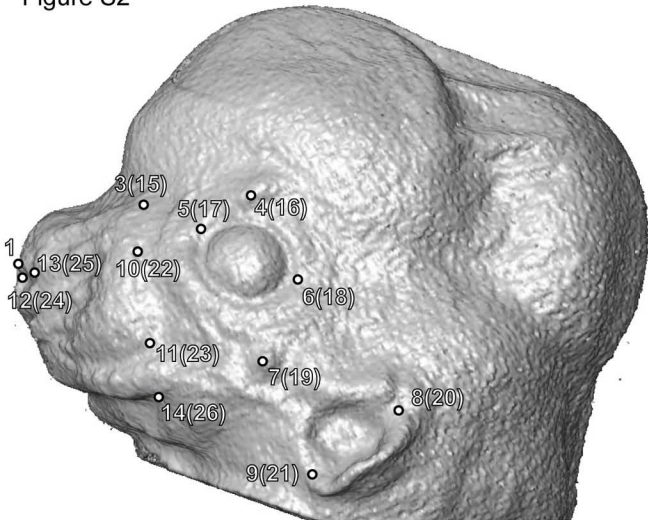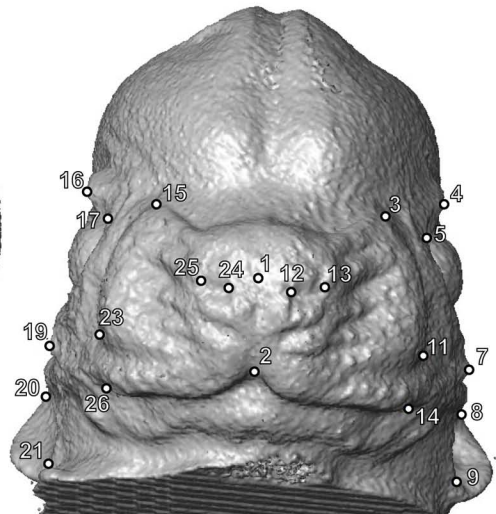



Figure S3

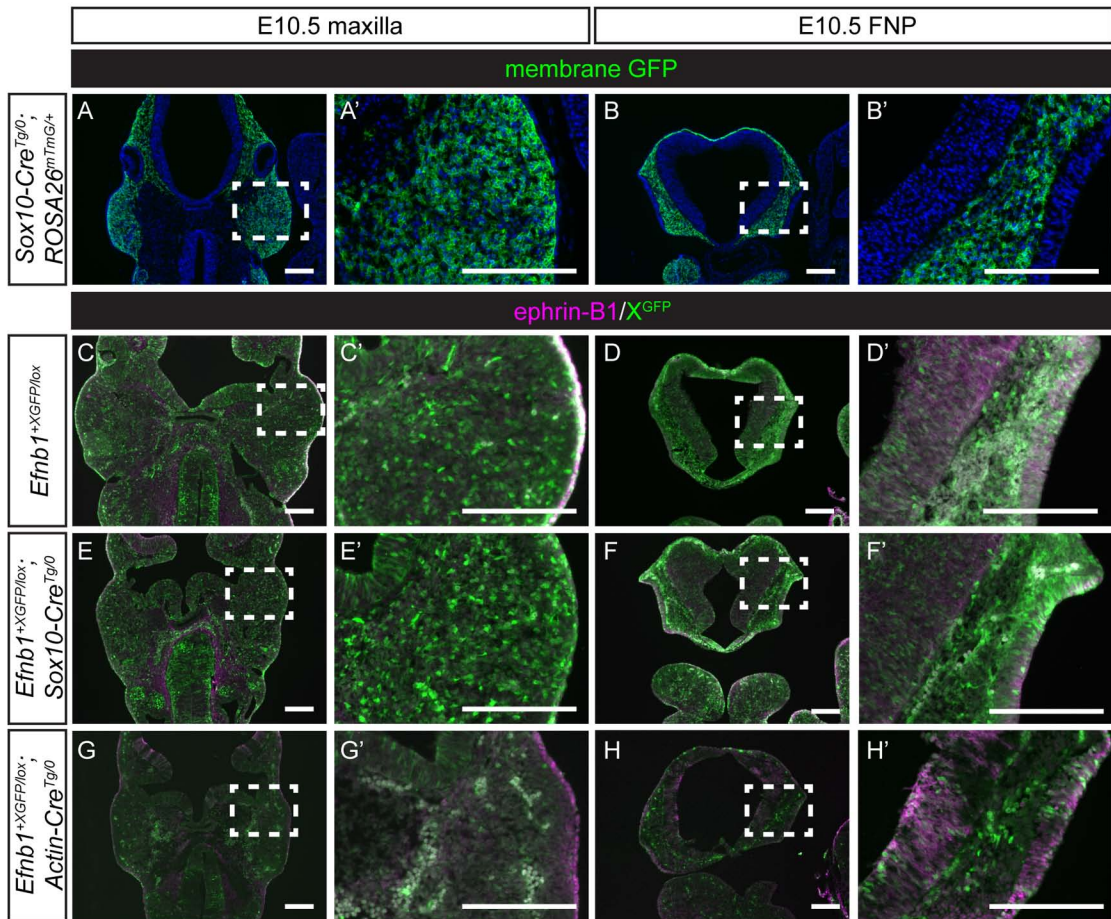

Figure S4

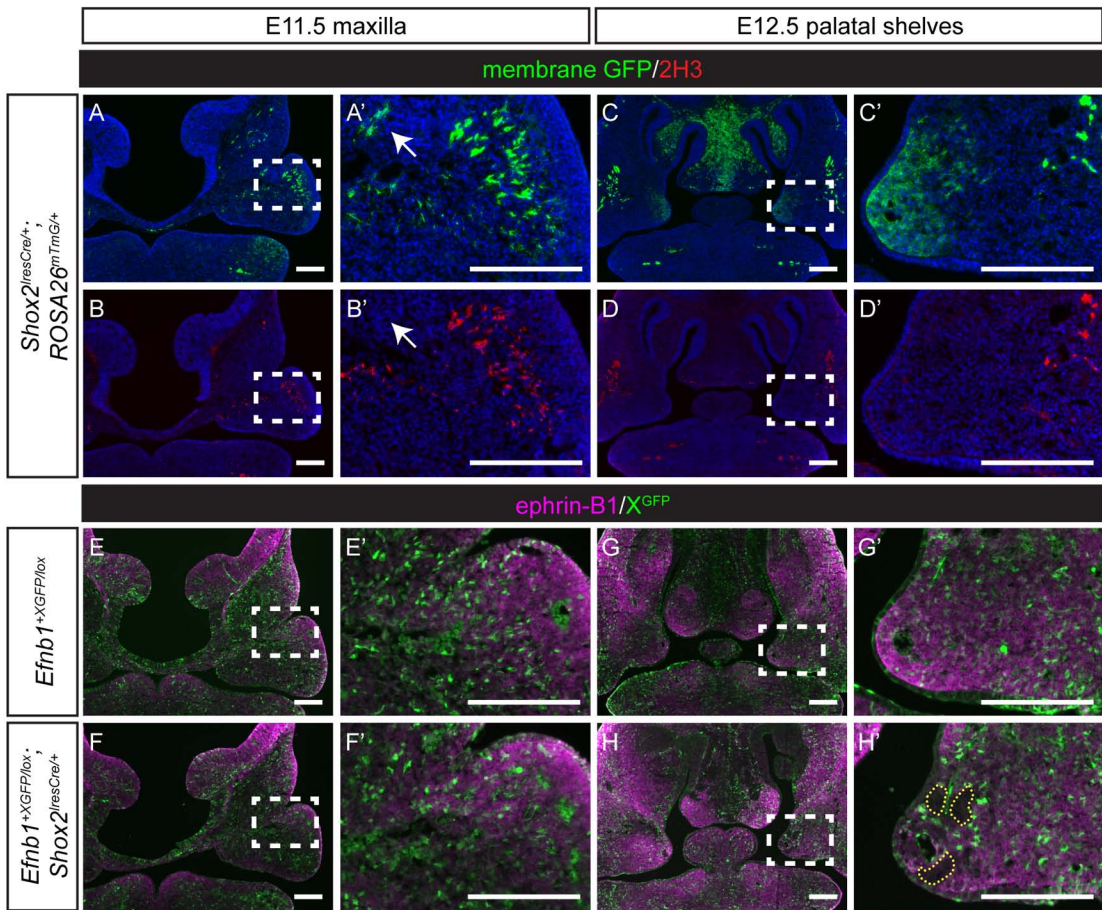

Figure S5

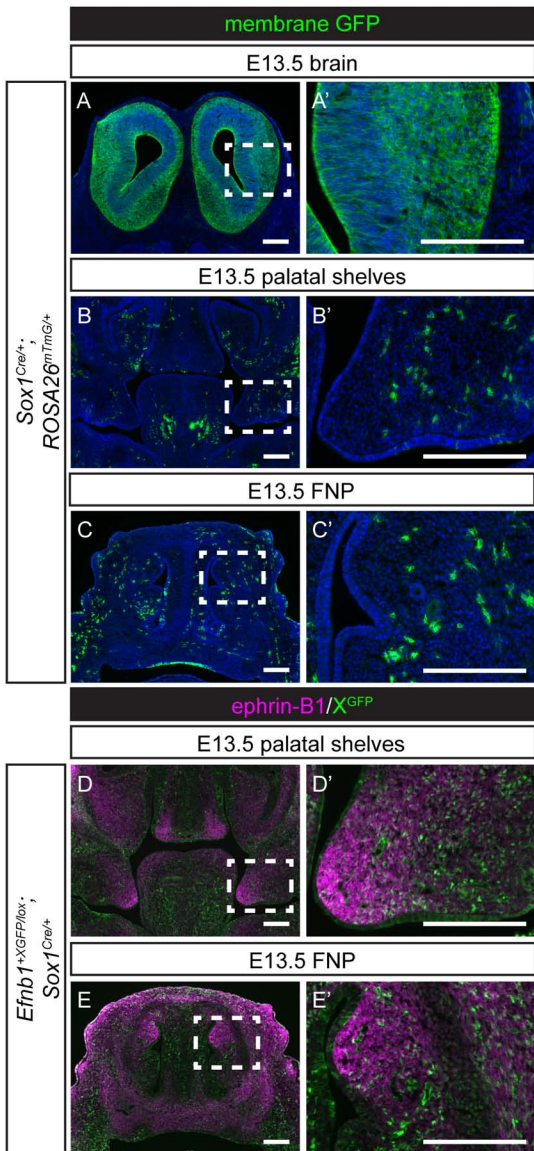



Figure S6

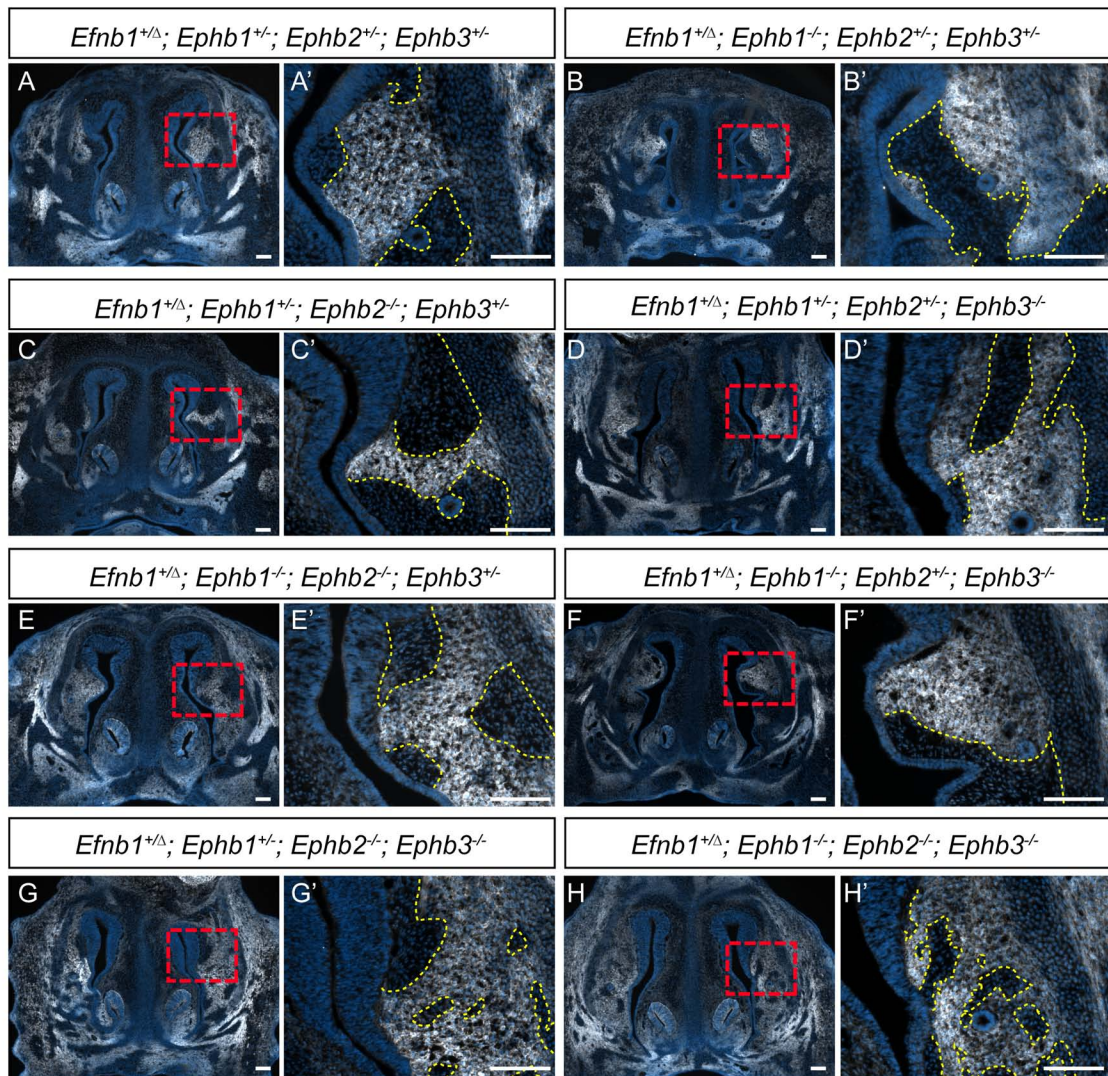

Figure S7

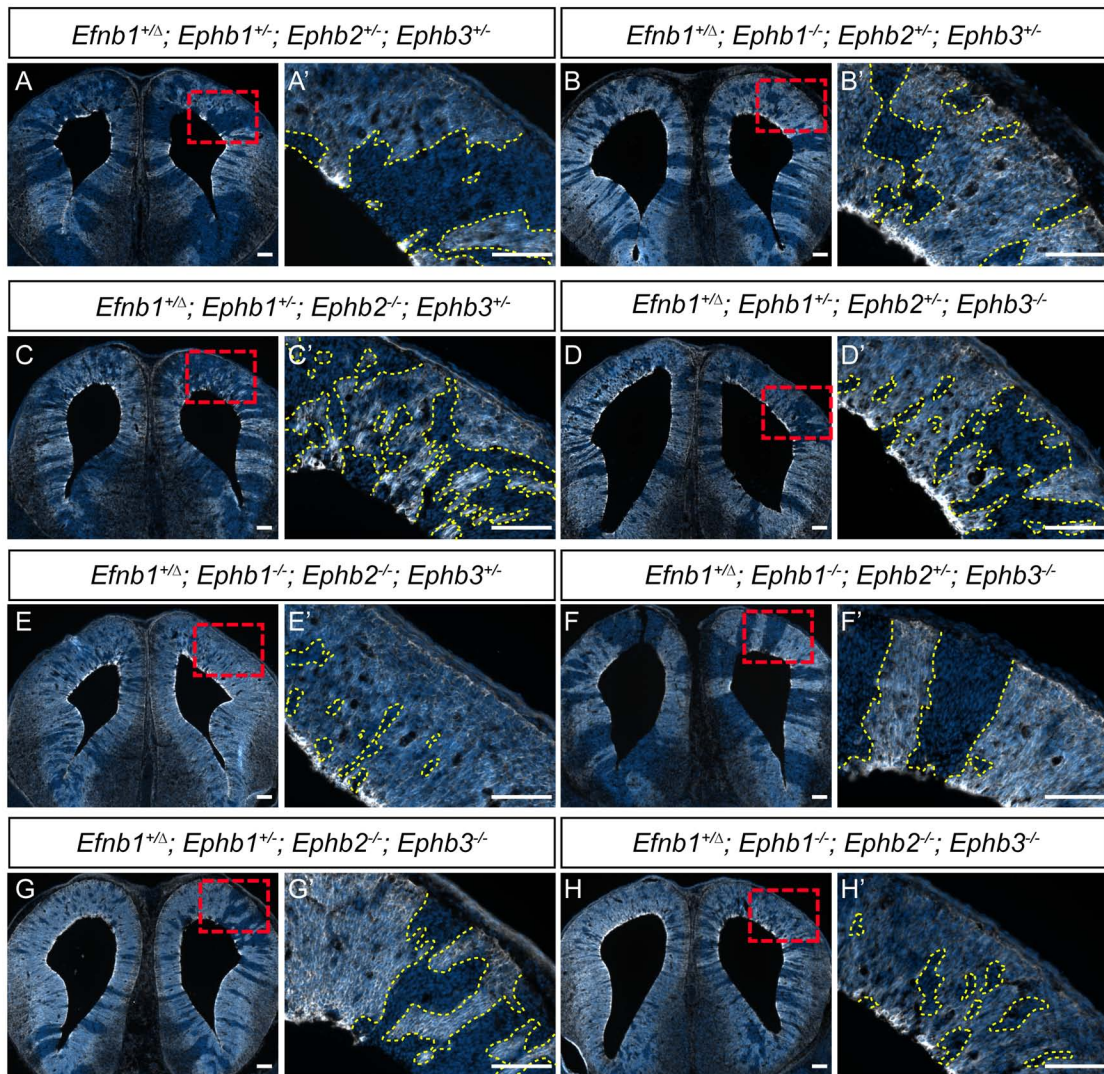

Source: https://www.biorxiv.org/content/10.1101/704619v1.full.pdf
